# Supplementary material for: Monthly variations in growth pattern and condition factor of Periophthalmodon septemradiatus (Gobiiformes: Periophthalminae) living along the Bassac River in Viet Nam
Source: PeerJ. 2022 Aug 12;10:e13880. doi: 10.7717/peerj.13880 (PMC9380723; doi:10.7717/peerj.13880)
Supplement: Supplemental Information 1 [file peerj-10-13880-s001.xlsx]

## Sheet: Raw data
No	Gen	W	TL	CF	Month	Size (1: immature; 2: mature)	Site (1: LXAG; 2: TNCT; 3: CRCT; 4: KSST; 5: LPST)	Season (1: dry season; 2: wet season)
1	Male	5.43	8.5	0.974131	2017-07-01	2	5	1
2	Male	5.51	8.7	0.920603	2017-07-01	2	5	1
3	Male	5.59	8.9	0.87124	2017-07-01	2	5	1
4	Male	5.28	8.7	0.882175	2017-07-01	2	5	1
5	Male	5.1	8.3	0.984057	2017-07-01	2	5	1
6	Male	5.78	9.1	0.841647	2017-07-01	2	5	1
7	Male	5.83	8.8	0.940602	2017-07-01	2	5	1
8	Male	5.92	9.1	0.862033	2017-07-01	2	5	1
9	Male	11.87	11.05	0.954367	2017-07-01	2	5	1
10	Male	11.52	11.05	0.926227	2017-07-01	2	5	1
11	Male	10.97	10.6	1.00163	2017-07-01	2	5	1
12	Male	10.99	11.3	0.825165	2017-07-01	2	5	1
13	Male	6.69	9	1.00765	2017-07-01	2	5	1
14	Male	7.71	9.3	1.05045	2017-07-01	2	5	1
15	Male	4.44	8	0.958828	2017-07-01	1	5	1
16	Male	12.13	11.4	0.886541	2017-07-01	2	5	1
17	Male	4.95	8.4	0.920757	2017-07-01	2	5	1
18	Male	12.59	11.4	0.920161	2017-07-01	2	5	1
19	Male	12.86	11.6	0.891198	2017-07-01	2	5	1
22	Male	4.5	7.7	1.09231	2017-07-01	1	5	1
23	Male	4.84	8.3	0.933889	2017-07-01	2	5	1
24	Male	4.23	7.5	1.11285	2017-07-01	1	5	1
25	Male	11.05	11.2	0.852539	2017-07-01	2	5	1
26	Male	4.52	8.2	0.90509	2017-07-01	2	5	1
27	Male	8.6	9.5	1.09787	2017-07-01	2	5	1
28	Male	2.91	6.4	1.24365	2017-07-01	1	5	1
29	Male	5.49	8	1.18558	2017-07-01	1	5	1
30	Male	2.01	5.8	1.16086	2017-07-01	1	5	1
31	Male	3.27	6.9	1.11024	2017-07-01	1	5	1
32	Male	4.53	7.6	1.14446	2017-07-01	1	5	1
38	Male	2.3	6.3	1.03147	2017-08-01	1	5	1
42	Male	2.8	6.9	0.950668	2017-08-01	1	5	1
43	Male	4.67	8	1.0085	2017-08-01	1	5	1
44	Male	10.7	10.3	1.06666	2017-08-01	2	5	1
45	Male	5.16	8.2	1.03324	2017-08-01	2	5	1
46	Male	12.68	11	1.03373	2017-08-01	2	5	1
47	Male	3.82	7.2	1.13866	2017-08-01	1	5	1
48	Male	8.07	8.7	1.34832	2017-08-01	2	5	1
49	Male	5.88	8.1	1.22245	2017-08-01	1	5	1
50	Male	5.65	8.5	1.0136	2017-08-01	2	5	1
51	Male	3.22	6.8	1.1432	2017-08-01	1	5	1
52	Male	7.42	9.5	0.947234	2017-09-01	2	5	1
53	Male	7.7	9.5	0.982979	2017-09-01	2	5	1
54	Male	10.65	10.2	1.09383	2017-09-01	2	5	1
55	Male	8.48	9.6	1.04843	2017-09-01	2	5	1
56	Male	5.78	8.6	1.00048	2017-09-01	2	5	1
57	Male	5.8	8.5	1.04051	2017-09-01	2	5	1
58	Male	6.89	9.1	1.00328	2017-09-01	2	5	1
59	Male	5.01	8.3	0.966691	2017-09-01	2	5	1
60	Male	8.84	10	0.964633	2017-09-01	2	5	1
61	Male	7.51	9.2	1.0576	2017-09-01	2	5	1
62	Male	10.02	10.5	0.941802	2017-09-01	2	5	1
63	Male	9.39	10.1	0.993932	2017-09-01	2	5	1
71	Male	7.09	9.2	0.998457	2017-10-01	2	5	1
72	Male	6.05	8.9	0.942934	2017-10-01	2	5	1
73	Male	10.57	10.4	1.02301	2017-10-01	2	5	1
74	Male	3.59	7.3	1.02589	2017-10-01	1	5	1
75	Male	7.75	9.6	0.958173	2017-10-01	2	5	1
76	Male	7.49	9.4	0.987629	2017-10-01	2	5	1
77	Male	4.93	8.1	1.02495	2017-10-01	1	5	1
78	Male	8.21	9.6	1.01505	2017-10-01	2	5	1
79	Male	6.08	8.9	0.94761	2017-10-01	2	5	1
80	Male	3.4	7.5	0.894492	2017-10-01	1	5	1
81	Male	3.84	7.8	0.896033	2017-10-01	1	5	1
82	Male	8.65	9.9	0.97337	2017-10-01	2	5	1
83	Male	9.11	10	0.994096	2017-10-01	2	5	1
84	Male	3.57	7.5	0.939217	2017-10-01	1	5	1
85	Male	7.54	9.3	1.02729	2017-10-01	2	5	1
86	Male	8.12	10	0.886066	2017-10-01	2	5	1
87	Male	8.73	9.9	0.982372	2017-10-01	2	5	1
88	Male	6.31	9.1	0.918823	2017-10-01	2	5	1
89	Male	2.67	6.8	0.947931	2017-10-01	1	5	1
90	Male	3.21	7.2	0.95683	2017-10-01	1	5	1
91	Male	2.09	6.4	0.893206	2017-10-01	1	5	1
92	Male	3.62	7.6	0.914555	2017-10-01	1	5	1
97	Male	4.39	8.2	0.879059	2017-11-01	2	5	1
98	Male	4.8	8.5	0.86111	2017-11-01	2	5	1
99	Male	8.61	10.5	0.809273	2017-11-01	2	5	1
100	Male	9.15	10.4	0.885577	2017-11-01	2	5	1
101	Male	3.3	7.4	0.904574	2017-11-01	1	5	1
105	Male	3.67	7.8	0.856365	2017-11-01	1	5	1
116	Male	8.27	9.5	1.05574	2017-11-01	2	5	1
117	Male	6.46	9	0.973004	2017-11-01	2	5	1
118	Male	3.66	7.5	0.962894	2017-11-01	1	5	1
119	Male	3.79	7.5	0.997096	2017-11-01	1	5	1
120	Male	2.85	7	0.925977	2017-11-01	1	5	1
121	Male	3.41	7.5	0.897123	2017-11-01	1	5	1
122	Male	2.53	6.9	0.858996	2017-11-01	1	5	1
123	Male	9.48	11	0.772855	2017-12-01	2	5	1
124	Male	4.88	8.3	0.941608	2017-12-01	2	5	1
125	Male	6.82	9.35	0.914075	2017-12-01	2	5	1
126	Male	4.83	8.3	0.93196	2017-12-01	2	5	1
127	Male	3.5	7.8	0.816696	2017-12-01	1	5	1
128	Male	5.31	8.5	0.952603	2017-12-01	2	5	1
129	Male	5.27	8.6	0.9122	2017-12-01	2	5	1
130	Male	3.62	7.9	0.812414	2017-12-01	1	5	1
131	Male	6.22	8.8	1.00352	2017-12-01	2	5	1
132	Male	3.05	7.2	0.909138	2017-12-01	1	5	1
133	Male	2.36	6.7	0.876717	2017-12-01	1	5	1
134	Male	3.27	7.2	0.974715	2017-12-01	1	5	1
135	Male	2.91	6.4	1.24365	2017-12-01	1	5	1
136	Male	3.23	7.2	0.962792	2017-12-01	1	5	1
137	Male	3.7	8	0.799023	2017-12-01	1	5	1
154	Male	5.43	8.7	0.907236	2018-01-01	2	5	2
155	Male	4.1	7.19	1.22733	2018-01-01	1	5	2
156	Male	2.5	6.8	0.887575	2018-01-01	1	5	2
157	Male	4.95	8.8	0.798625	2018-01-01	2	5	2
158	Male	5.31	8.7	0.887187	2018-01-01	2	5	2
159	Male	2.53	6.9	0.858996	2018-01-01	1	5	2
160	Male	5.27	8.5	0.945427	2018-01-01	2	5	2
161	Male	4.09	7.5	1.07602	2018-01-01	1	5	2
162	Male	1.85	5.8	1.06845	2018-01-01	1	5	2
163	Male	2.78	6.9	0.943877	2018-01-01	1	5	2
164	Male	2.93	6.7	1.08847	2018-01-01	1	5	2
176	Male	5.87	8.9	0.91488	2018-02-01	2	5	2
177	Male	6.11	9	0.920287	2018-02-01	2	5	2
178	Male	3.27	7.5	0.860291	2018-02-01	1	5	2
179	Male	6.01	9	0.905225	2018-02-01	2	5	2
180	Male	3.04	7.2	0.906157	2018-02-01	1	5	2
181	Male	5.11	8.7	0.853771	2018-02-01	2	5	2
182	Male	4.55	8.3	0.877933	2018-02-01	2	5	2
183	Male	4.32	8.2	0.865042	2018-02-01	2	5	2
184	Male	3.64	7.8	0.849364	2018-02-01	1	5	2
185	Male	3.84	8	0.829257	2018-02-01	1	5	2
186	Male	2.53	6.9	0.858996	2018-02-01	1	5	2
187	Male	3.78	8.3	0.72936	2018-02-01	2	5	2
188	Male	3.91	7	1.27037	2018-02-01	1	5	2
196	Male	14.06	11	1.14624	2018-03-01	2	5	2
197	Male	6.38	8.4	1.18675	2018-03-01	2	5	2
198	Male	13.07	10.4	1.26497	2018-03-01	2	5	2
199	Male	15	11.2	1.15729	2018-03-01	2	5	2
200	Male	10.29	10.4	0.995911	2018-03-01	2	5	2
201	Male	3.84	7.5	1.01025	2018-03-01	1	5	2
202	Male	4.14	7.3	1.18306	2018-03-01	1	5	2
203	Male	5.69	8.3	1.0979	2018-03-01	2	5	2
204	Male	3.4	7.1	1.05777	2018-03-01	1	5	2
205	Male	5.29	8	1.14239	2018-03-01	1	5	2
206	Male	3.72	7.2	1.10885	2018-03-01	1	5	2
208	Male	9.61	10	1.04866	2018-03-01	2	5	2
218	Male	7.22	9.7	0.864794	2018-04-01	2	5	2
219	Male	6.52	9.4	0.859725	2018-04-01	2	5	2
220	Male	2.57	7	0.835003	2018-04-01	1	5	2
221	Male	5.93	8.7	0.990776	2018-04-01	2	5	2
222	Male	2.84	7.2	0.846541	2018-04-01	1	5	2
223	Male	2.96	7.5	0.778734	2018-04-01	1	5	2
224	Male	6.73	8.9	1.04892	2018-04-01	2	5	2
225	Male	4.54	7.5	1.19441	2018-04-01	1	5	2
226	Male	5.84	9.2	0.822424	2018-04-01	2	5	2
227	Male	5.59	9.8	0.648875	2018-04-01	2	5	2
228	Male	5.13	9	0.77268	2018-04-01	2	5	2
229	Male	8.21	10	0.895887	2018-04-01	2	5	2
230	Male	8.13	9.9	0.914855	2018-04-01	2	5	2
231	Male	2.75	7.1	0.855546	2018-04-01	1	5	2
232	Male	3.06	7.4	0.838787	2018-04-01	1	5	2
233	Male	8.28	10	0.903525	2018-04-01	2	5	2
234	Male	2.5	7	0.81226	2018-04-01	1	5	2
235	Male	2.59	7.2	0.772022	2018-04-01	1	5	2
248	Male	10.57	10.6	0.965105	2018-05-01	2	5	2
249	Male	7.48	9.7	0.895936	2018-05-01	2	5	2
250	Male	9.8	10.4	0.948486	2018-05-01	2	5	2
251	Male	10.4	10.7	0.922695	2018-05-01	2	5	2
252	Male	8.04	10.2	0.825768	2018-05-01	2	5	2
253	Male	10.31	10.8	0.889048	2018-05-01	2	5	2
254	Male	4.12	8	0.889723	2018-05-01	1	5	2
255	Male	3.72	7.8	0.868032	2018-05-01	1	5	2
256	Male	4.48	8.2	0.897081	2018-05-01	2	5	2
257	Male	2.64	6.9	0.896344	2018-05-01	1	5	2
258	Male	3.26	7.5	0.85766	2018-05-01	1	5	2
259	Male	3.87	7.8	0.903033	2018-05-01	1	5	2
260	Male	3.23	7.3	0.923013	2018-05-01	1	5	2
261	Male	2.9	7.2	0.864426	2018-05-01	1	5	2
263	Male	3.3	7.2	0.983657	2018-05-01	1	5	2
264	Male	2.07	6.2	0.974887	2018-05-01	1	5	2
265	Male	3.5	7.6	0.884238	2018-05-01	1	5	2
266	Male	3.29	7.2	0.980677	2018-05-01	1	5	2
267	Male	2.8	7.1	0.871101	2018-05-01	1	5	2
268	Male	2.66	7.1	0.827546	2018-05-01	1	5	2
269	Male	2.72	6.8	0.965682	2018-05-01	1	5	2
270	Male	2.68	7.1	0.833769	2018-05-01	1	5	2
271	Male	2.45	7	0.796015	2018-05-01	1	5	2
272	Male	2.25	6.5	0.917045	2018-05-01	1	5	2
273	Male	2.94	7.1	0.914657	2018-05-01	1	5	2
274	Male	2.23	6.3	1.00007	2018-05-01	1	5	2
275	Male	3	7.3	0.857288	2018-05-01	1	5	2
276	Male	2.21	6.6	0.859642	2018-05-01	1	5	2
277	Male	1.74	6.1	0.861262	2018-05-01	1	5	2
278	Male	1.85	6	0.963201	2018-05-01	1	5	2
280	Male	10.7	10.5	1.00572	2018-06-01	2	5	2
281	Male	9.21	10.1	0.974879	2018-06-01	2	5	2
282	Male	6.2	9.4	0.81753	2018-06-01	2	5	2
283	Male	9.28	10.3	0.925101	2018-06-01	2	5	2
284	Male	7.9	9.4	1.04169	2018-06-01	2	5	2
285	Male	7.96	10.1	0.842566	2018-06-01	2	5	2
286	Male	5.26	8.7	0.878833	2018-06-01	2	5	2
287	Male	6.14	8.6	1.06279	2018-06-01	2	5	2
288	Male	8.16	10	0.890431	2018-06-01	2	5	2
289	Male	5.56	9	0.837446	2018-06-01	2	5	2
290	Male	5.89	9.1	0.857665	2018-06-01	2	5	2
291	Male	5.17	8.5	0.927487	2018-06-01	2	5	2
292	Male	5.57	8.7	0.930627	2018-06-01	2	5	2
293	Male	6.09	9.3	0.829732	2018-06-01	2	5	2
294	Male	5.23	8.6	0.905276	2018-06-01	2	5	2
295	Male	6.51	9.5	0.831064	2018-06-01	2	5	2
296	Male	4.68	8.5	0.839582	2018-06-01	2	5	2
297	Male	6.82	9.5	0.870639	2018-06-01	2	5	2
298	Male	6.83	9.21	0.958651	2018-06-01	2	5	2
299	Male	5.07	8.5	0.909548	2018-06-01	2	5	2
300	Male	4.25	8.2	0.851025	2018-06-01	2	5	2
301	Male	4.21	8.5	0.755265	2018-06-01	2	5	2
302	Male	4.22	8	0.911319	2018-06-01	1	5	2
303	Male	6.37	9.3	0.867881	2018-06-01	2	5	2
304	Male	5.64	8.8	0.909948	2018-06-01	2	5	2
305	Male	4.9	8.5	0.87905	2018-06-01	2	5	2
306	Male	4.57	8.5	0.819849	2018-06-01	2	5	2
307	Male	7.07	9.5	0.902553	2018-06-01	2	5	2
315	Male	6.02	9	0.906731	2018-07-01	2	5	2
316	Male	6.75	9	1.01668	2018-07-01	2	5	2
317	Male	8.54	10	0.931897	2018-07-01	2	5	2
318	Male	6.63	9	0.99861	2018-07-01	2	5	2
319	Male	7.09	9	1.06789	2018-07-01	2	5	2
320	Male	5.65	8.7	0.943994	2018-07-01	2	5	2
321	Male	5.75	9	0.866064	2018-07-01	2	5	2
322	Male	5.31	8.2	1.06328	2018-07-01	2	5	2
323	Male	5.65	8.5	1.0136	2018-07-01	2	5	2
324	Male	7.37	9	1.11007	2018-07-01	2	5	2
325	Male	9.4	10.5	0.883527	2018-07-01	2	5	2
326	Male	4.06	7.8	0.947368	2018-07-01	1	5	2
327	Male	6.56	9.1	0.955226	2018-07-01	2	5	2
328	Male	7.3	10	0.796586	2018-07-01	2	5	2
329	Male	8.48	10	0.92535	2018-07-01	2	5	2
330	Male	9	10	0.982093	2018-07-01	2	5	2
331	Male	5.91	9	0.890163	2018-07-01	2	5	2
332	Male	3.92	8	0.846533	2018-07-01	1	5	2
333	Male	2.64	6.5	1.076	2018-07-01	1	5	2
345	Male	5.83	8.8	0.940602	2018-08-01	2	5	2
346	Male	5.92	9.1	0.862033	2018-08-01	2	5	2
347	Male	11.87	11.05	0.954367	2018-08-01	2	5	2
348	Male	11.52	11.05	0.926227	2018-08-01	2	5	2
349	Male	10.97	10.6	1.00163	2018-08-01	2	5	2
350	Male	10.99	11.3	0.825165	2018-08-01	2	5	2
351	Male	6.69	9	1.00765	2018-08-01	2	5	2
352	Male	7.71	9.3	1.05045	2018-08-01	2	5	2
353	Male	4.44	8	0.958828	2018-08-01	1	5	2
354	Male	12.13	11.4	0.886541	2018-08-01	2	5	2
355	Male	4.95	8.4	0.920757	2018-08-01	2	5	2
356	Male	12.59	11.4	0.920161	2018-08-01	2	5	2
357	Male	12.86	11.6	0.891198	2018-08-01	2	5	2
360	Male	4.5	7.7	1.09231	2018-08-01	1	5	2
361	Male	4.84	8.3	0.933889	2018-08-01	2	5	2
362	Male	4.23	7.5	1.11285	2018-08-01	1	5	2
363	Male	11.05	11.2	0.852539	2018-08-01	2	5	2
364	Male	4.52	8.2	0.90509	2018-08-01	2	5	2
365	Male	8.6	9.5	1.09787	2018-08-01	2	5	2
366	Male	2.91	6.4	1.24365	2018-08-01	1	5	2
367	Male	5.49	8	1.18558	2018-08-01	1	5	2
368	Male	2.01	5.8	1.16086	2018-08-01	1	5	2
369	Male	3.27	6.9	1.11024	2018-08-01	1	5	2
370	Male	4.53	7.6	1.14446	2018-08-01	1	5	2
374	Male	2.01	5.8	1.16086	2018-08-01	1	5	2
375	Male	3.14	7.5	0.82609	2018-09-01	1	5	2
376	Male	2.47	7.2	0.736253	2018-09-01	1	5	2
377	Male	4.48	8.5	0.803703	2018-09-01	2	5	2
378	Male	1.96	6.5	0.798848	2018-09-01	1	5	2
379	Male	1.87	6.5	0.762166	2018-09-01	1	5	2
380	Male	2.37	7	0.770023	2018-09-01	1	5	2
381	Male	1.96	6.3	0.878989	2018-09-01	1	5	2
382	Male	2	6.3	0.896927	2018-09-01	1	5	2
383	Male	2.69	7.4	0.737365	2018-09-01	1	5	2
384	Male	2.23	7	0.724536	2018-09-01	1	5	2
385	Male	2.42	7	0.786268	2018-09-01	1	5	2
386	Male	2.03	7	0.659555	2018-09-01	1	5	2
387	Male	2.38	6.8	0.844972	2018-09-01	1	5	2
388	Male	3.06	7.3	0.874434	2018-09-01	1	5	2
389	Male	2.58	7	0.838252	2018-09-01	1	5	2
390	Male	5.35	8.6	0.926047	2018-09-01	2	5	2
391	Male	2.11	6.7	0.783844	2018-09-01	1	5	2
392	Male	2.26	6.7	0.839568	2018-09-01	1	5	2
400	Male	6.61	9	0.995597	2018-09-01	2	5	2
401	Male	2.36	7	0.766774	2018-09-01	1	5	2
402	Male	2.96	7.3	0.845857	2018-09-01	1	5	2
403	Male	4.24	8.1	0.881496	2018-09-01	1	5	2
405	Male	8.42	10.5	0.791415	2018-10-01	2	5	2
406	Male	6.84	9.9	0.769694	2018-10-01	2	5	2
407	Male	8.02	10.2	0.823714	2018-10-01	2	5	2
408	Male	8.25	10.5	0.775436	2018-10-01	2	5	2
409	Male	8.03	10.5	0.754758	2018-10-01	2	5	2
410	Male	4.33	8.5	0.776793	2018-10-01	2	5	2
411	Male	3.24	7.5	0.852398	2018-10-01	1	5	2
412	Male	2.43	6.9	0.825044	2018-10-01	1	5	2
413	Male	4.93	9	0.742556	2018-10-01	2	5	2
414	Male	7.17	9.6	0.886465	2018-10-01	2	5	2
415	Male	3.58	8	0.773109	2018-10-01	1	5	2
416	Male	2.37	6.5	0.965954	2018-10-01	1	5	2
417	Male	3.09	7.6	0.780656	2018-10-01	1	5	2
418	Male	2.55	7	0.828505	2018-10-01	1	5	2
419	Male	2.75	7.1	0.855546	2018-10-01	1	5	2
420	Male	2.59	7	0.841501	2018-10-01	1	5	2
421	Male	1.56	6	0.812213	2018-10-01	1	5	2
422	Male	2.3	6.8	0.816569	2018-10-01	1	5	2
423	Male	2.74	7.5	0.720855	2018-10-01	1	5	2
424	Male	2.83	7.4	0.775741	2018-10-01	1	5	2
435	Male	3.92	7.5	1.0313	2018-11-01	1	5	2
436	Male	2.53	6.7	0.93987	2018-11-01	1	5	2
437	Male	2.88	6.9	0.977829	2018-11-01	1	5	2
438	Male	1.72	6	0.895517	2018-11-01	1	5	2
439	Male	2.78	7	0.903233	2018-11-01	1	5	2
440	Male	3.68	7.4	1.00874	2018-11-01	1	5	2
441	Male	2.22	6.3	0.995589	2018-11-01	1	5	2
442	Male	2.5	6.8	0.887575	2018-11-01	1	5	2
443	Male	11.71	11.2	0.90346	2018-11-01	2	5	2
444	Male	6.68	9.4	0.880822	2018-11-01	2	5	2
445	Male	3.99	7.6	1.00803	2018-11-01	1	5	2
446	Male	3.22	7	1.04619	2018-11-01	1	5	2
447	Male	3.58	7.5	0.941848	2018-11-01	1	5	2
448	Male	3.59	7.5	0.944478	2018-11-01	1	5	2
449	Male	4.09	7.8	0.954368	2018-11-01	1	5	2
450	Male	3.5	7.5	0.920801	2018-11-01	1	5	2
451	Male	9.11	9.6	1.12632	2018-11-01	2	5	2
452	Male	4.34	7.8	1.0127	2018-11-01	1	5	2
453	Male	4.79	7.8	1.11771	2018-11-01	1	5	2
456	Male	3.91	7.6	0.98782	2018-11-01	1	5	2
465	Male	10.74	11	0.875576	2018-12-01	2	5	2
466	Male	6.3	9.2	0.887204	2018-12-01	2	5	2
467	Male	4.34	8	0.937233	2018-12-01	1	5	2
468	Male	8.33	9.8	0.966929	2018-12-01	2	5	2
469	Male	5.95	8.8	0.959963	2018-12-01	2	5	2
470	Male	3.3	7.5	0.868184	2018-12-01	1	5	2
471	Male	7.28	9.7	0.87198	2018-12-01	2	5	2
472	Male	4.53	8	0.978264	2018-12-01	1	5	2
473	Male	3.37	7.3	0.96302	2018-12-01	1	5	2
474	Male	3.77	7.8	0.879699	2018-12-01	1	5	2
485	Male	3.15	7.2	0.938946	2018-12-01	1	5	2
486	Male	5.34	8.6	0.924316	2018-12-01	2	5	2
487	Male	3.08	7	1.0007	2018-12-01	1	5	2
488	Male	2.64	7.2	0.786926	2018-12-01	1	5	2
489	Male	6.43	9.2	0.905512	2018-12-01	2	5	2
490	Male	3.44	7.6	0.86908	2018-12-01	1	5	2
491	Male	2.31	6.4	0.987228	2018-12-01	1	5	2
492	Male	5.07	8.5	0.909548	2018-12-01	2	5	2
493	Male	3.18	7.2	0.947888	2018-12-01	1	5	2
494	Male	2.3	6.7	0.854427	2018-12-01	1	5	2
495	Male	7.46	9.6	0.922319	2019-01-01	2	5	2
496	Male	8.09	9.6	1.00021	2019-01-01	2	5	2
497	Male	9.2	9.9	1.03526	2019-01-01	2	5	2
498	Male	6.53	8.8	1.05354	2019-01-01	2	5	2
499	Male	5.66	8.9	0.88215	2019-01-01	2	5	2
500	Male	3.42	7.3	0.977308	2019-01-01	1	5	2
501	Male	3.22	6.9	1.09327	2019-01-01	1	5	2
502	Male	2.57	6.8	0.912428	2019-01-01	1	5	2
503	Male	5.51	8.6	0.953742	2019-01-01	2	5	2
504	Male	6.32	9.2	0.890021	2019-01-01	2	5	2
505	Male	7.39	9.3	1.00685	2019-01-01	2	5	2
506	Male	4.37	8	0.943711	2019-01-01	1	5	2
507	Male	4.67	8	1.0085	2019-01-01	1	5	2
508	Male	6.53	8.5	1.17147	2019-01-01	2	5	2
509	Male	3.36	7.7	0.815594	2019-01-01	1	5	2
510	Male	5.46	8.4	1.01562	2019-01-01	2	5	2
511	Male	3.53	7.7	0.856859	2019-01-01	1	5	2
512	Male	2.7	6.8	0.958581	2019-01-01	1	5	2
513	Male	3.24	7.1	1.00799	2019-01-01	1	5	2
514	Male	2.87	7	0.932475	2019-01-01	1	5	2
532	Male	3.78	7.5	0.994465	2019-02-01	1	5	2
533	Male	5.89	8.9	0.917997	2019-02-01	2	5	2
534	Male	2.34	6.8	0.830771	2019-02-01	1	5	2
535	Male	8.03	9.7	0.961813	2019-02-01	2	5	2
536	Male	5.91	9.1	0.860577	2019-02-01	2	5	2
537	Male	5.69	8.9	0.886826	2019-02-01	2	5	2
538	Male	3.52	7.7	0.854432	2019-02-01	1	5	2
539	Male	7.02	9	1.05735	2019-02-01	2	5	2
540	Male	7.47	9.4	0.984992	2019-02-01	2	5	2
541	Male	5	8.5	0.89699	2019-02-01	2	5	2
542	Male	6.63	9.1	0.965419	2019-02-01	2	5	2
543	Male	8.74	9.7	1.04686	2019-02-01	2	5	2
544	Male	3.63	7.2	1.08202	2019-02-01	1	5	2
545	Male	4.25	8.1	0.883575	2019-02-01	1	5	2
546	Male	5.83	8.9	0.908646	2019-02-01	2	5	2
547	Male	7.91	9.6	0.977955	2019-02-01	2	5	2
548	Male	4.05	7.8	0.945034	2019-02-01	1	5	2
549	Male	8.43	9.8	0.978536	2019-02-01	2	5	2
565	Male	7.44	9.6	0.919846	2019-03-01	2	5	2
566	Male	4.78	8.6	0.827384	2019-03-01	2	5	2
567	Male	4.56	8.4	0.848212	2019-03-01	2	5	2
568	Male	4.71	8.5	0.844964	2019-03-01	2	5	2
569	Male	5.52	8.9	0.86033	2019-03-01	2	5	2
570	Male	3.79	7.8	0.884366	2019-03-01	1	5	2
571	Male	5.88	8.9	0.916438	2019-03-01	2	5	2
572	Male	3.48	7.5	0.915539	2019-03-01	1	5	2
573	Male	3.93	7.8	0.917033	2019-03-01	1	5	2
574	Male	1.74	6	0.90593	2019-03-01	1	5	2
575	Male	2.87	6.8	1.01894	2019-03-01	1	5	2
576	Male	1.6	5.6	1.02878	2019-03-01	1	5	2
577	Male	3.02	7.2	0.900196	2019-03-01	1	5	2
578	Male	1.84	5.7	1.12074	2019-03-01	1	5	2
579	Male	2.15	6.3	0.964197	2019-03-01	1	5	2
580	Male	2.48	6.5	1.01079	2019-03-01	1	5	2
581	Male	2.26	6.5	0.921121	2019-03-01	1	5	2
582	Male	4.08	7.8	0.952035	2019-03-01	1	5	2
583	Male	2.88	7	0.935724	2019-03-01	1	5	2
600	Male	6.27	9.2	0.882979	2019-04-01	2	5	2
601	Male	7.78	9.8	0.903086	2019-04-01	2	5	2
602	Male	7.6	9.7	0.910309	2019-04-01	2	5	2
603	Male	7.72	9.4	1.01796	2019-04-01	2	5	2
604	Male	6.73	9.1	0.979981	2019-04-01	2	5	2
605	Male	5.14	8.6	0.889697	2019-04-01	2	5	2
606	Male	6.33	8.6	1.09568	2019-04-01	2	5	2
607	Male	4.99	8.1	1.03742	2019-04-01	1	5	2
608	Male	3.39	7.5	0.891861	2019-04-01	1	5	2
609	Male	2.32	6.4	0.991502	2019-04-01	1	5	2
610	Male	1.78	6	0.926756	2019-04-01	1	5	2
611	Male	1.61	5.7	0.980652	2019-04-01	1	5	2
612	Male	1.9	5.9	1.04142	2019-04-01	1	5	2
613	Male	2.92	6.9	0.99141	2019-04-01	1	5	2
614	Male	1.55	5.7	0.944106	2019-04-01	1	5	2
615	Male	11.1	10.9	0.930562	2019-04-01	2	5	2
616	Male	10.55	10.1	1.11672	2019-04-01	2	5	2
617	Male	6.16	9	0.927818	2019-04-01	2	5	2
618	Male	12.08	11.5	0.859612	2019-04-01	2	5	2
619	Male	8.24	9.7	0.986967	2019-04-01	2	5	2
620	Male	7.71	9.7	0.923485	2019-04-01	2	5	2
639	Male	7.34	9.5	0.937022	2019-05-01	2	5	2
640	Male	11.21	11	0.913893	2019-05-01	2	5	2
641	Male	6.09	9.3	0.829732	2019-05-01	2	5	2
642	Male	3.97	7.8	0.926367	2019-05-01	1	5	2
643	Male	11.45	10.6	1.04545	2019-05-01	2	5	2
644	Male	10.94	10.9	0.917149	2019-05-01	2	5	2
645	Male	4.09	7.6	1.0333	2019-05-01	1	5	2
646	Male	5.65	8.7	0.943994	2019-05-01	2	5	2
647	Male	5.76	8.9	0.897736	2019-05-01	2	5	2
648	Male	8.88	9.9	0.999252	2019-05-01	2	5	2
649	Male	14.57	11.9	0.933838	2019-05-01	2	5	2
650	Male	8.63	9.7	1.03368	2019-05-01	2	5	2
651	Male	6.41	8.7	1.07097	2019-05-01	2	5	2
652	Male	10.29	10.4	0.995911	2019-05-01	2	5	2
653	Male	9.55	9.9	1.07465	2019-05-01	2	5	2
654	Male	10.86	10.5	1.02076	2019-05-01	2	5	2
655	Male	5.45	8.6	0.943356	2019-05-01	2	5	2
656	Male	10.34	10.5	0.97188	2019-05-01	2	5	2
657	Male	12	10.9	1.00601	2019-05-01	2	5	2
658	Male	6.43	9.4	0.847858	2019-05-01	2	5	2
659	Male	6.73	9	1.01367	2019-05-01	2	5	2
660	Male	7.2	9.5	0.919149	2019-05-01	2	5	2
661	Male	7.1	9.4	0.936203	2019-05-01	2	5	2
677	Male	7.13	9.2	1.00409	2019-06-01	2	5	2
678	Male	6.65	8.9	1.03645	2019-06-01	2	5	2
679	Male	6.49	9	0.977523	2019-06-01	2	5	2
680	Male	7.34	9.4	0.96785	2019-06-01	2	5	2
681	Male	5.03	8.4	0.935638	2019-06-01	2	5	2
682	Male	10.4	10.5	0.977519	2019-06-01	2	5	2
683	Male	12.49	11	1.01824	2019-06-01	2	5	2
684	Male	6.28	9.3	0.855619	2019-06-01	2	5	2
685	Male	6.52	9.2	0.918186	2019-06-01	2	5	2
686	Male	7.91	9.5	1.00979	2019-06-01	2	5	2
687	Male	9.12	10	0.995187	2019-06-01	2	5	2
688	Male	8.64	9.9	0.972245	2019-06-01	2	5	2
689	Male	7.12	9.3	0.970065	2019-06-01	2	5	2
690	Male	7.54	9.3	1.02729	2019-06-01	2	5	2
691	Male	4.9	8.4	0.911456	2019-06-01	2	5	2
692	Male	5.2	8.4	0.96726	2019-06-01	2	5	2
693	Male	4.12	7.9	0.924626	2019-06-01	1	5	2
694	Male	5.69	8.9	0.886826	2019-06-01	2	5	2
695	Male	5.63	9	0.84799	2019-06-01	2	5	2
20	Female	4.3	8.2	0.861037	2017-07-01	2	5	1
21	Female	4.09	7.9	0.917893	2017-07-01	2	5	1
33	Female	4.11	7.8	0.959035	2017-07-01	2	5	1
34	Female	2.76	6.4	1.17955	2017-07-01	1	5	1
35	Female	7.91	8.9	1.23283	2017-07-01	2	5	1
36	Female	2.95	6.9	1.0016	2017-07-01	2	5	1
37	Female	5.38	8.3	1.03808	2017-08-01	2	5	1
39	Female	1.8	5.7	1.09638	2017-08-01	1	5	1
40	Female	4.72	7.9	1.05928	2017-08-01	2	5	1
41	Female	3.35	7.2	0.998561	2017-08-01	2	5	1
64	Female	3.63	7.3	1.03732	2017-09-01	2	5	1
65	Female	6.08	8.5	1.09074	2017-09-01	2	5	1
66	Female	4.82	7.9	1.08172	2017-09-01	2	5	1
67	Female	4.65	8.2	0.931122	2017-09-01	2	5	1
68	Female	6.08	8.5	1.09074	2017-09-01	2	5	1
69	Female	3.36	7.1	1.04532	2017-09-01	2	5	1
70	Female	4.44	7.9	0.996441	2017-09-01	2	5	1
93	Female	3.58	7.3	1.02303	2017-10-01	2	5	1
94	Female	6.01	8.8	0.969643	2017-10-01	2	5	1
95	Female	5.28	8.1	1.09771	2017-10-01	2	5	1
96	Female	5.54	8.9	0.863447	2017-10-01	2	5	1
102	Female	7.55	9.8	0.876388	2017-11-01	2	5	1
103	Female	5.55	8.9	0.865006	2017-11-01	2	5	1
104	Female	5.02	8.3	0.968621	2017-11-01	2	5	1
106	Female	3.65	7.7	0.885988	2017-11-01	2	5	1
107	Female	2.46	6.7	0.913866	2017-11-01	2	5	1
108	Female	4.05	7.6	1.02319	2017-11-01	2	5	1
109	Female	2	6.3	0.896927	2017-11-01	1	5	1
110	Female	2.09	6.3	0.937289	2017-11-01	1	5	1
111	Female	2.17	6.4	0.927396	2017-11-01	1	5	1
112	Female	8.26	10	0.901343	2017-11-01	2	5	1
113	Female	2.68	7	0.870743	2017-11-01	2	5	1
114	Female	2.18	6.5	0.888515	2017-11-01	1	5	1
115	Female	4.07	8	0.878926	2017-11-01	2	5	1
138	Female	2.98	7	0.968214	2017-12-01	2	5	1
139	Female	1.77	6	0.921549	2017-12-01	1	5	1
140	Female	2.9	6.9	0.98462	2017-12-01	2	5	1
141	Female	3.48	7.5	0.915539	2017-12-01	2	5	1
142	Female	3.51	7.5	0.923432	2017-12-01	2	5	1
143	Female	3.89	7.7	0.944245	2017-12-01	2	5	1
144	Female	5.65	9	0.851002	2017-12-01	2	5	1
145	Female	3.57	7.7	0.866569	2017-12-01	2	5	1
146	Female	4.7	8.1	0.97713	2017-12-01	2	5	1
147	Female	3.42	7.3	0.977308	2017-12-01	2	5	1
148	Female	4.28	8	0.924276	2017-12-01	2	5	1
149	Female	4.22	8.1	0.877338	2017-12-01	2	5	1
150	Female	3.33	7.8	0.777028	2017-12-01	2	5	1
151	Female	2.9	7.2	0.864426	2017-12-01	2	5	1
152	Female	3.22	7.1	1.00177	2017-12-01	2	5	1
153	Female	2.21	6.6	0.859642	2017-12-01	1	5	1
165	Female	2.48	6.7	0.921295	2018-01-01	2	5	2
166	Female	4.31	7.7	1.04619	2018-01-01	2	5	2
167	Female	2.93	7	0.951969	2018-01-01	2	5	2
168	Female	4.53	7.9	1.01664	2018-01-01	2	5	2
169	Female	2.45	6.5	0.99856	2018-01-01	1	5	2
170	Female	4.13	7.8	0.963702	2018-01-01	2	5	2
171	Female	2.38	6.5	0.97003	2018-01-01	1	5	2
172	Female	3.04	7	0.987708	2018-01-01	2	5	2
173	Female	3.12	7.2	0.930003	2018-01-01	2	5	2
174	Female	4.3	8.2	0.861037	2018-01-01	2	5	2
175	Female	3.99	7.5	1.04971	2018-01-01	2	5	2
189	Female	3.31	7.2	0.986638	2018-02-01	2	5	2
190	Female	3.42	7.6	0.864027	2018-02-01	2	5	2
191	Female	3.52	7.4	0.964879	2018-02-01	2	5	2
192	Female	3.2	6.3	1.43508	2018-02-01	1	5	2
193	Female	3.36	6.5	1.36945	2018-02-01	1	5	2
194	Female	3.08	7	1.0007	2018-02-01	2	5	2
195	Female	4.51	7.5	1.18652	2018-02-01	2	5	2
207	Female	6.9	8.9	1.07541	2018-03-01	2	5	2
209	Female	10.25	10	1.11849	2018-03-01	2	5	2
210	Female	9.48	9.8	1.10042	2018-03-01	2	5	2
211	Female	4.29	7.4	1.17595	2018-03-01	2	5	2
212	Female	4.24	7.3	1.21163	2018-03-01	2	5	2
213	Female	1.14	5	1.03673	2018-03-01	1	5	2
214	Female	1.34	5.2	1.08084	2018-03-01	1	5	2
215	Female	5.64	8.3	1.08825	2018-03-01	2	5	2
216	Female	5.24	8	1.13159	2018-03-01	2	5	2
217	Female	3.77	7.3	1.07732	2018-03-01	2	5	2
236	Female	2.2	6.7	0.817278	2018-04-01	2	5	2
237	Female	7.76	8.7	1.29653	2018-04-01	2	5	2
238	Female	5.28	8.9	0.822924	2018-04-01	2	5	2
239	Female	6.03	9.4	0.795114	2018-04-01	2	5	2
240	Female	5.22	8.2	1.04526	2018-04-01	2	5	2
241	Female	3.42	7.9	0.767529	2018-04-01	2	5	2
242	Female	5.08	8.4	0.944938	2018-04-01	2	5	2
243	Female	3.07	7.1	0.955101	2018-04-01	2	5	2
244	Female	2.94	7.2	0.876349	2018-04-01	2	5	2
245	Female	3.63	7.9	0.814658	2018-04-01	2	5	2
246	Female	2.8	7.5	0.736641	2018-04-01	2	5	2
247	Female	3.68	8.1	0.765072	2018-04-01	2	5	2
262	Female	3.54	7.5	0.931324	2018-05-01	2	5	2
279	Female	2.12	6.5	0.86406	2018-05-01	1	5	2
308	Female	4.01	8	0.865969	2018-06-01	2	5	2
309	Female	4.81	9	0.724481	2018-06-01	2	5	2
310	Female	5.96	9.5	0.760851	2018-06-01	2	5	2
311	Female	5.16	9.2	0.726663	2018-06-01	2	5	2
312	Female	3.29	7.7	0.798603	2018-06-01	2	5	2
313	Female	4.82	8.5	0.864698	2018-06-01	2	5	2
314	Female	4.42	8.7	0.738487	2018-06-01	2	5	2
334	Female	2.04	6.5	0.831454	2018-07-01	1	5	2
335	Female	2.48	6.7	0.921295	2018-07-01	2	5	2
336	Female	3.97	7.8	0.926367	2018-07-01	2	5	2
337	Female	2.92	7	0.94872	2018-07-01	2	5	2
338	Female	2.53	6.8	0.898226	2018-07-01	2	5	2
339	Female	4.16	8.2	0.833003	2018-07-01	2	5	2
340	Female	2.13	6	1.10898	2018-07-01	1	5	2
341	Female	3.79	7.2	1.12972	2018-07-01	2	5	2
342	Female	5.11	8.5	0.916724	2018-07-01	2	5	2
343	Female	3.04	7.5	0.799781	2018-07-01	2	5	2
344	Female	3.31	7.5	0.870814	2018-07-01	2	5	2
358	Female	4.3	8.2	0.861037	2018-08-01	2	5	2
359	Female	4.09	7.9	0.917893	2018-08-01	2	5	2
371	Female	4.11	7.8	0.959035	2018-08-01	2	5	2
372	Female	2.76	6.4	1.17955	2018-08-01	1	5	2
373	Female	7.91	8.9	1.23283	2018-08-01	2	5	2
393	Female	1.37	5.8	0.791233	2018-09-01	1	5	2
394	Female	2.42	7	0.786268	2018-09-01	2	5	2
395	Female	1.94	6.5	0.790696	2018-09-01	1	5	2
396	Female	2.57	6	1.33807	2018-09-01	1	5	2
397	Female	1.74	6	0.90593	2018-09-01	1	5	2
398	Female	1.6	6	0.833039	2018-09-01	1	5	2
399	Female	1.77	6.4	0.756447	2018-09-01	1	5	2
425	Female	3.51	7.8	0.81903	2018-10-01	2	5	2
426	Female	2.21	6.6	0.859642	2018-10-01	1	5	2
427	Female	1.91	6.1	0.945408	2018-10-01	1	5	2
428	Female	2.14	6.8	0.759765	2018-10-01	2	5	2
429	Female	2.28	6.9	0.774115	2018-10-01	2	5	2
430	Female	1.89	6.2	0.890114	2018-10-01	1	5	2
431	Female	1.95	6.5	0.794772	2018-10-01	1	5	2
432	Female	4.39	8.1	0.912681	2018-10-01	2	5	2
433	Female	3.48	8	0.751514	2018-10-01	2	5	2
434	Female	1.84	6.5	0.749939	2018-10-01	1	5	2
454	Female	5.8	9	0.873595	2018-11-01	2	5	2
455	Female	4.56	8	0.984742	2018-11-01	2	5	2
457	Female	2.54	6.9	0.862391	2018-11-01	2	5	2
458	Female	2.33	6.3	1.04492	2018-11-01	1	5	2
459	Female	2.82	6.9	0.957458	2018-11-01	2	5	2
460	Female	2.51	6.6	0.976335	2018-11-01	1	5	2
461	Female	2.48	6.4	1.05988	2018-11-01	1	5	2
462	Female	1.86	6	0.968408	2018-11-01	1	5	2
463	Female	3.41	7	1.10792	2018-11-01	2	5	2
464	Female	1.58	5.8	0.912517	2018-11-01	1	5	2
475	Female	6.51	9	0.980535	2018-12-01	2	5	2
476	Female	4.92	8.5	0.882638	2018-12-01	2	5	2
477	Female	4.34	8.2	0.869047	2018-12-01	2	5	2
480	Female	3.08	7.3	0.880149	2018-12-01	2	5	2
481	Female	3.96	8	0.855171	2018-12-01	2	5	2
482	Female	3.48	7.5	0.915539	2018-12-01	2	5	2
483	Female	3.81	7.6	0.962556	2018-12-01	2	5	2
484	Female	2.12	6.8	0.752664	2018-12-01	2	5	2
515	Female	4.66	8.3	0.899158	2019-01-01	2	5	2
516	Female	4.65	8.3	0.897229	2019-01-01	2	5	2
517	Female	3.84	7.8	0.896033	2019-01-01	2	5	2
518	Female	4.65	7.9	1.04357	2019-01-01	2	5	2
519	Female	4.48	8.2	0.897081	2019-01-01	2	5	2
520	Female	2.14	6.4	0.914575	2019-01-01	1	5	2
521	Female	2.92	7.1	0.908434	2019-01-01	2	5	2
522	Female	5.41	8.3	1.04387	2019-01-01	2	5	2
523	Female	2.75	6.8	0.976333	2019-01-01	2	5	2
524	Female	3.92	7.8	0.9147	2019-01-01	2	5	2
525	Female	1.79	6.4	0.764995	2019-01-01	1	5	2
526	Female	4.94	8.3	0.953185	2019-01-01	2	5	2
527	Female	3.9	7.8	0.910033	2019-01-01	2	5	2
528	Female	3.85	7.9	0.864031	2019-01-01	2	5	2
529	Female	2.28	6.6	0.88687	2019-01-01	1	5	2
530	Female	6.82	9.1	0.993086	2019-01-01	2	5	2
531	Female	4.78	8.2	0.957153	2019-01-01	2	5	2
550	Female	5.77	8.6	0.998746	2019-02-01	2	5	2
551	Female	4.57	8.3	0.881792	2019-02-01	2	5	2
552	Female	2.59	7	0.841501	2019-02-01	2	5	2
553	Female	3.57	7.5	0.939217	2019-02-01	2	5	2
554	Female	4.01	8.1	0.833679	2019-02-01	2	5	2
555	Female	3.63	7.2	1.08202	2019-02-01	2	5	2
556	Female	3.2	7.5	0.841875	2019-02-01	2	5	2
557	Female	2.84	7	0.922727	2019-02-01	2	5	2
558	Female	1.33	5.6	0.855174	2019-02-01	1	5	2
559	Female	1.87	6	0.973614	2019-02-01	1	5	2
560	Female	1.52	5.8	0.877864	2019-02-01	1	5	2
561	Female	2.57	6.5	1.04747	2019-02-01	1	5	2
562	Female	3.08	7.1	0.958212	2019-02-01	2	5	2
563	Female	1.99	6.1	0.985007	2019-02-01	1	5	2
564	Female	2.4	6.5	0.978181	2019-02-01	1	5	2
584	Female	5.32	8.5	0.954397	2019-03-01	2	5	2
585	Female	3.23	7.1	1.00488	2019-03-01	2	5	2
586	Female	3.09	7.2	0.921061	2019-03-01	2	5	2
587	Female	4.05	7.6	1.02319	2019-03-01	2	5	2
588	Female	2.81	7	0.91298	2019-03-01	2	5	2
589	Female	1.79	5.9	0.98113	2019-03-01	1	5	2
590	Female	3.31	7.3	0.945874	2019-03-01	2	5	2
591	Female	3.54	7.7	0.859287	2019-03-01	2	5	2
592	Female	3.65	7.6	0.922134	2019-03-01	2	5	2
593	Female	5.07	8.2	1.01522	2019-03-01	2	5	2
594	Female	3.9	8	0.842214	2019-03-01	2	5	2
595	Female	4.39	7.5	1.15495	2019-03-01	2	5	2
596	Female	3.53	7.7	0.856859	2019-03-01	2	5	2
597	Female	3.31	7.2	0.986638	2019-03-01	2	5	2
598	Female	2.55	6.7	0.9473	2019-03-01	2	5	2
599	Female	8.64	9.3	1.17716	2019-03-01	2	5	2
621	Female	5.67	8.5	1.01719	2019-04-01	2	5	2
622	Female	6.6	8.9	1.02866	2019-04-01	2	5	2
623	Female	6.1	8.6	1.05587	2019-04-01	2	5	2
624	Female	5.3	8.2	1.06128	2019-04-01	2	5	2
625	Female	4.12	7.8	0.961368	2019-04-01	2	5	2
626	Female	4.53	8.3	0.874074	2019-04-01	2	5	2
627	Female	9.27	10.5	0.871308	2019-04-01	2	5	2
628	Female	5.54	8.6	0.958935	2019-04-01	2	5	2
629	Female	5.2	8.7	0.868808	2019-04-01	2	5	2
630	Female	4.81	8.2	0.96316	2019-04-01	2	5	2
631	Female	4.39	8	0.94803	2019-04-01	2	5	2
632	Female	4.83	7	1.56929	2019-04-01	2	5	2
633	Female	3.5	7.3	1.00017	2019-04-01	2	5	2
634	Female	3.2	7.3	0.91444	2019-04-01	2	5	2
635	Female	3.83	7.8	0.893699	2019-04-01	2	5	2
636	Female	3.3	7.2	0.983657	2019-04-01	2	5	2
637	Female	1.89	6.3	0.847596	2019-04-01	1	5	2
638	Female	1.6	5.7	0.974561	2019-04-01	1	5	2
662	Female	1.62	5.8	0.935618	2019-05-01	1	5	2
663	Female	6.1	8.7	1.01918	2019-05-01	2	5	2
664	Female	4.4	8.3	0.84899	2019-05-01	2	5	2
665	Female	3.7	7.1	1.1511	2019-05-01	2	5	2
666	Female	2.07	6.3	0.92832	2019-05-01	1	5	2
667	Female	2.99	7	0.971463	2019-05-01	2	5	2
668	Female	3.37	7.5	0.8866	2019-05-01	2	5	2
669	Female	2.59	6.8	0.919528	2019-05-01	2	5	2
670	Female	1.98	6.3	0.887958	2019-05-01	1	5	2
671	Female	2.01	6.3	0.901412	2019-05-01	1	5	2
672	Female	3.9	7.8	0.910033	2019-05-01	2	5	2
673	Female	2.97	7.3	0.848715	2019-05-01	2	5	2
674	Female	7.05	9.2	0.992824	2019-05-01	2	5	2
675	Female	5.5	8.4	1.02306	2019-05-01	2	5	2
676	Female	6.72	9.1	0.978524	2019-05-01	2	5	2
696	Female	7.16	9.2	1.00831	2019-06-01	2	5	2
697	Female	6.37	8.7	1.06429	2019-06-01	2	5	2
698	Female	3.75	7.4	1.02793	2019-06-01	2	5	2
699	Female	2.44	6.4	1.04279	2019-06-01	1	5	2
700	Female	3.2	7.1	0.995545	2019-06-01	2	5	2
701	Female	2.99	7.3	0.85443	2019-06-01	2	5	2
702	Female	2.26	6.5	0.921121	2019-06-01	1	5	2
703	Female	2.45	6.5	0.99856	2019-06-01	1	5	2
704	Female	2.68	6.7	0.995593	2019-06-01	2	5	2
705	Female	5.36	8.5	0.961573	2019-06-01	2	5	2
706	Female	4.28	7.8	0.998703	2019-06-01	2	5	2
707	Female	2.5	6.8	0.887575	2019-06-01	2	5	2
708	Female	1.92	6.3	0.86105	2019-06-01	1	5	2
709	Female	2.6	6.5	1.0597	2019-06-01	1	5	2
1	Male	2.41	6.8	0.855623	2017-07-01	1	4	1
2	Male	1.77	6.4	0.756447	2017-07-01	1	4	1
3	Male	2.48	6.7	0.921295	2017-07-01	1	4	1
4	Male	2.95	7.1	0.917768	2017-07-01	1	4	1
5	Male	6.59	9.4	0.868955	2017-07-01	2	4	1
6	Male	5.31	8.6	0.919123	2017-07-01	2	4	1
7	Male	4.8	8.2	0.961158	2017-07-01	2	4	1
8	Male	6.29	9.3	0.856981	2017-07-01	2	4	1
9	Male	5.64	8.7	0.942323	2017-07-01	2	4	1
10	Male	2.62	7.1	0.815102	2017-07-01	1	4	1
11	Male	1.95	6.4	0.833374	2017-07-01	1	4	1
12	Male	11.38	10.7	1.00964	2017-07-01	2	4	1
13	Male	2.96	7.4	0.811376	2017-07-01	1	4	1
14	Male	7.83	9.6	0.968064	2017-07-01	2	4	1
15	Male	3.52	7.4	0.964879	2017-07-01	1	4	1
16	Male	2.1	6.4	0.89748	2017-07-01	1	4	1
17	Male	2.35	6.8	0.834321	2017-07-01	1	4	1
18	Male	5.6	8.9	0.872799	2017-07-01	2	4	1
19	Male	3.67	7.9	0.823635	2017-07-01	1	4	1
20	Male	2.25	6.5	0.917045	2017-07-01	1	4	1
31	Male	2.89	7	0.938973	2017-08-01	1	4	1
32	Male	3.44	7.3	0.983023	2017-08-01	1	4	1
33	Male	2.66	6.9	0.903134	2017-08-01	1	4	1
61	Male	10.06	10.6	0.918538	2017-09-01	2	4	1
62	Male	2.74	6.7	1.01788	2017-09-01	1	4	1
63	Male	4.71	8.05	0.997933	2017-09-01	1	4	1
64	Male	2.33	6.5	0.949651	2017-09-01	1	4	1
65	Male	2.72	6.7	1.01045	2017-09-01	1	4	1
66	Male	2.1	6.3	0.941774	2017-09-01	1	4	1
67	Male	4.7	8	1.01498	2017-09-01	1	4	1
68	Male	2.41	6.7	0.895291	2017-09-01	1	4	1
69	Male	2.78	6.85	0.965111	2017-09-01	1	4	1
70	Male	5.14	8.35	0.97372	2017-09-01	2	4	1
71	Male	2.85	7	0.925977	2017-09-01	1	4	1
72	Male	3.9	7.65	0.965727	2017-09-01	1	4	1
73	Male	2.52	6.4	1.07698	2017-09-01	1	4	1
74	Male	3.63	7.3	1.03732	2017-09-01	1	4	1
75	Male	2.38	6.35	1.04184	2017-09-01	1	4	1
76	Male	2.62	6.55	1.04311	2017-09-01	1	4	1
77	Male	7.73	9.65	0.940634	2017-09-01	2	4	1
78	Male	2.19	6.2	1.0314	2017-09-01	1	4	1
79	Male	2.22	6.6	0.863531	2017-09-01	1	4	1
80	Male	2.33	6.5	0.949651	2017-09-01	1	4	1
81	Male	2.89	6.9	0.981225	2017-09-01	1	4	1
82	Male	3.73	7.5	0.98131	2017-09-01	1	4	1
83	Male	2.09	6.35	0.914895	2017-09-01	1	4	1
84	Male	2.77	6.9	0.940482	2017-09-01	1	4	1
85	Male	1.92	5.8	1.10888	2017-09-01	1	4	1
86	Male	2.72	6.75	0.987731	2017-09-01	1	4	1
87	Male	2.87	6.8	1.01894	2017-09-01	1	4	1
88	Male	2.82	7	0.916229	2017-09-01	1	4	1
92	Male	3.81	7.7	0.924826	2017-10-01	1	4	1
93	Male	4.62	8.2	0.925114	2017-10-01	2	4	1
94	Male	6.93	9.8	0.80442	2017-10-01	2	4	1
95	Male	2.2	6.3	0.98662	2017-10-01	1	4	1
96	Male	3.25	7.2	0.968753	2017-10-01	1	4	1
97	Male	3.2	7.2	0.95385	2017-10-01	1	4	1
98	Male	4.27	8.3	0.823907	2017-10-01	2	4	1
99	Male	3.29	7.3	0.940159	2017-10-01	1	4	1
100	Male	4.41	8.4	0.82031	2017-10-01	2	4	1
101	Male	3.34	7.5	0.878707	2017-10-01	1	4	1
102	Male	3.14	7.3	0.897295	2017-10-01	1	4	1
103	Male	2.98	6.8	1.05799	2017-10-01	1	4	1
104	Male	2.27	6.5	0.925196	2017-10-01	1	4	1
105	Male	2.32	6.1	1.14835	2017-10-01	1	4	1
111	Male	7.49	9.5	0.95617	2017-11-01	2	4	1
112	Male	2.68	6.7	0.995593	2017-11-01	1	4	1
113	Male	3.05	7	0.990957	2017-11-01	1	4	1
114	Male	3.94	7.9	0.884229	2017-11-01	1	4	1
115	Male	1.95	6	1.01527	2017-11-01	1	4	1
116	Male	3.9	7.5	1.02604	2017-11-01	1	4	1
117	Male	2.5	7	0.81226	2017-11-01	1	4	1
118	Male	2.87	7	0.932475	2017-11-01	1	4	1
119	Male	2.4	6.3	1.07631	2017-11-01	1	4	1
120	Male	1.46	5.6	0.938762	2017-11-01	1	4	1
121	Male	2.94	6.9	0.998201	2017-11-01	1	4	1
122	Male	2.75	6.9	0.933691	2017-11-01	1	4	1
123	Male	2.35	6.2	1.10676	2017-11-01	1	4	1
133	Male	3.31	7.3	0.945874	2017-12-01	1	4	1
134	Male	4.87	8.1	1.01247	2017-12-01	2	4	1
135	Male	3.42	7.3	0.977308	2017-12-01	1	4	1
136	Male	2.73	6.8	0.969232	2017-12-01	1	4	1
137	Male	3.76	7.6	0.949924	2017-12-01	1	4	1
138	Male	2.91	7	0.945471	2017-12-01	1	4	1
139	Male	3.64	7.4	0.997773	2017-12-01	1	4	1
140	Male	2.3	6.5	0.937424	2017-12-01	1	4	1
141	Male	1.9	6.1	0.940459	2017-12-01	1	4	1
142	Male	5.76	8.5	1.03333	2017-12-01	2	4	1
159	Male	6.91	9.3	0.941453	2018-01-01	2	4	2
160	Male	7.64	9.4	1.00741	2018-01-01	2	4	2
161	Male	8.68	9.7	1.03967	2018-01-01	2	4	2
162	Male	6.05	8.5	1.08536	2018-01-01	2	4	2
163	Male	5.15	8.5	0.9239	2018-01-01	2	4	2
164	Male	3.11	7	1.01045	2018-01-01	1	4	2
165	Male	2.93	6.6	1.13971	2018-01-01	1	4	2
176	Male	2.34	6.5	0.953727	2018-02-01	1	4	2
177	Male	5.01	8.2	1.00321	2018-02-01	2	4	2
178	Male	5.75	8.8	0.927695	2018-02-01	2	4	2
179	Male	6.85	9	1.03175	2018-02-01	2	4	2
180	Male	3.98	7.7	0.966091	2018-02-01	1	4	2
181	Male	4.25	7.7	1.03163	2018-02-01	1	4	2
183	Male	3.06	7.4	0.838787	2018-02-01	1	4	2
184	Male	4.97	8	1.07328	2018-02-01	1	4	2
185	Male	3.21	7.4	0.879904	2018-02-01	1	4	2
186	Male	2.46	6.5	1.00264	2018-02-01	1	4	2
187	Male	2.95	6.8	1.04734	2018-02-01	1	4	2
188	Male	2.61	6.7	0.969589	2018-02-01	1	4	2
189	Male	3.44	7.2	1.02539	2018-02-01	1	4	2
190	Male	5.36	8.5	0.961573	2018-02-01	2	4	2
191	Male	2.13	6.5	0.868136	2018-02-01	1	4	2
198	Male	7.58	9.5	0.96766	2018-03-01	2	4	2
199	Male	5.38	8.7	0.898882	2018-03-01	2	4	2
200	Male	5.18	8.5	0.929281	2018-03-01	2	4	2
201	Male	3.2	7.4	0.877163	2018-03-01	1	4	2
202	Male	6.5	8.7	1.08601	2018-03-01	2	4	2
203	Male	6.92	9.1	1.00765	2018-03-01	2	4	2
204	Male	4.55	8.1	0.945945	2018-03-01	2	4	2
205	Male	6.14	8.8	0.990617	2018-03-01	2	4	2
206	Male	8.25	9.5	1.05319	2018-03-01	2	4	2
207	Male	3.3	6.9	1.12043	2018-03-01	1	4	2
208	Male	3.87	7.8	0.903033	2018-03-01	1	4	2
209	Male	5.3	8.5	0.950809	2018-03-01	2	4	2
210	Male	7.47	9.4	0.984992	2018-03-01	2	4	2
211	Male	3.69	7.5	0.970787	2018-03-01	1	4	2
212	Male	7.96	9.6	0.984137	2018-03-01	2	4	2
213	Male	6.89	9.3	0.938728	2018-03-01	2	4	2
214	Male	4.35	8.2	0.871049	2018-03-01	2	4	2
215	Male	4.15	8	0.896202	2018-03-01	1	4	2
216	Male	4.29	8.1	0.891891	2018-03-01	2	4	2
217	Male	5.02	8.5	0.900578	2018-03-01	2	4	2
218	Male	3.45	7.5	0.907646	2018-03-01	1	4	2
219	Male	5.35	8.5	0.959779	2018-03-01	2	4	2
220	Male	3.17	7.2	0.944907	2018-03-01	1	4	2
221	Male	3.58	7.5	0.941848	2018-03-01	1	4	2
222	Male	1.59	5.8	0.918292	2018-03-01	1	4	2
233	Male	2.61	6.5	1.06377	2018-04-01	1	4	2
234	Male	1.46	5.4	1.04923	2018-04-01	1	4	2
235	Male	2.75	6.9	0.933691	2018-04-01	1	4	2
236	Male	1.68	5.5	1.14143	2018-04-01	1	4	2
237	Male	1.96	6	1.02047	2018-04-01	1	4	2
238	Male	2.26	6.2	1.06437	2018-04-01	1	4	2
239	Male	2.06	6.2	0.970177	2018-04-01	1	4	2
240	Male	3.71	7.5	0.976049	2018-04-01	1	4	2
241	Male	2.62	6.7	0.973304	2018-04-01	1	4	2
242	Male	5.7	8.8	0.919628	2018-04-01	2	4	2
243	Male	7.21	9.5	0.920426	2018-04-01	2	4	2
244	Male	7.04	9.4	0.928292	2018-04-01	2	4	2
245	Male	7.15	9.1	1.04114	2018-04-01	2	4	2
246	Male	6.24	8.8	1.00675	2018-04-01	2	4	2
247	Male	4.68	8.2	0.937129	2018-04-01	2	4	2
248	Male	5.76	8.2	1.15339	2018-04-01	2	4	2
249	Male	4.54	7.8	1.05937	2018-04-01	1	4	2
250	Male	3.09	7.2	0.921061	2018-04-01	1	4	2
251	Male	2.11	6.1	1.0444	2018-04-01	1	4	2
252	Male	1.62	5.8	0.935618	2018-04-01	1	4	2
253	Male	1.47	5.5	0.998753	2018-04-01	1	4	2
254	Male	1.73	5.7	1.05374	2018-04-01	1	4	2
255	Male	2.66	6.6	1.03468	2018-04-01	1	4	2
256	Male	1.41	5.5	0.957987	2018-04-01	1	4	2
269	Male	10.48	10.6	0.956887	2018-05-01	2	4	2
270	Male	9.96	9.9	1.12078	2018-05-01	2	4	2
271	Male	5.6	8.6	0.96932	2018-05-01	2	4	2
272	Male	11.4	11.2	0.879543	2018-05-01	2	4	2
273	Male	7.78	9.5	0.993192	2018-05-01	2	4	2
274	Male	7.14	9.4	0.941478	2018-05-01	2	4	2
275	Male	6.8	9.2	0.957617	2018-05-01	2	4	2
276	Male	10.58	10.7	0.938665	2018-05-01	2	4	2
277	Male	5.54	8.9	0.863447	2018-05-01	2	4	2
278	Male	3.61	7.5	0.94974	2018-05-01	1	4	2
279	Male	10.81	10.3	1.07762	2018-05-01	2	4	2
280	Male	10.33	10.6	0.943191	2018-05-01	2	4	2
281	Male	3.72	7.3	1.06304	2018-05-01	1	4	2
282	Male	5.14	8.3	0.991775	2018-05-01	2	4	2
283	Male	5.24	8.5	0.940045	2018-05-01	2	4	2
284	Male	8.38	9.7	1.00374	2018-05-01	2	4	2
285	Male	13.75	11.6	0.952875	2018-05-01	2	4	2
286	Male	8.15	9.5	1.04043	2018-05-01	2	4	2
287	Male	5.83	8.3	1.12491	2018-05-01	2	4	2
288	Male	9.71	10.1	1.0278	2018-05-01	2	4	2
298	Male	9.01	9.7	1.0792	2018-06-01	2	4	2
299	Male	10.25	10.2	1.05275	2018-06-01	2	4	2
300	Male	4.96	8.2	0.993196	2018-06-01	2	4	2
301	Male	9.76	10.2	1.00243	2018-06-01	2	4	2
302	Male	11.33	10.6	1.0345	2018-06-01	2	4	2
303	Male	5.85	9	0.881126	2018-06-01	2	4	2
304	Male	6.24	8.7	1.04257	2018-06-01	2	4	2
305	Male	6.67	9.2	0.93931	2018-06-01	2	4	2
306	Male	6.58	9.1	0.958138	2018-06-01	2	4	2
307	Male	6.61	8.9	1.03021	2018-06-01	2	4	2
308	Male	6.16	8.6	1.06625	2018-06-01	2	4	2
309	Male	5.9	8.6	1.02125	2018-06-01	2	4	2
310	Male	6.8	9.1	0.990174	2018-06-01	2	4	2
311	Male	4.58	8	0.989061	2018-06-01	1	4	2
329	Male	9.82	10.2	1.00859	2018-07-01	2	4	2
330	Male	11.79	10.7	1.04602	2018-07-01	2	4	2
331	Male	5.71	8.9	0.889943	2018-07-01	2	4	2
332	Male	5.93	8.8	0.956736	2018-07-01	2	4	2
333	Male	7.47	9.3	1.01775	2018-07-01	2	4	2
334	Male	8.61	9.8	0.999431	2018-07-01	2	4	2
335	Male	8.16	9.7	0.977384	2018-07-01	2	4	2
336	Male	6.6	9	0.994091	2018-07-01	2	4	2
337	Male	6.99	9	1.05283	2018-07-01	2	4	2
338	Male	4.46	8	0.963147	2018-07-01	1	4	2
339	Male	4.73	8	1.02145	2018-07-01	1	4	2
340	Male	3.75	7.6	0.947398	2018-07-01	1	4	2
341	Male	5.18	8.5	0.929281	2018-07-01	2	4	2
342	Male	5.12	8.6	0.886236	2018-07-01	2	4	2
343	Male	5.27	8.5	0.945427	2018-07-01	2	4	2
344	Male	5.88	9	0.885645	2018-07-01	2	4	2
345	Male	4.57	8.5	0.819849	2018-07-01	2	4	2
346	Male	4.76	8.4	0.885414	2018-07-01	2	4	2
359	Male	2.89	7	0.938973	2018-08-01	1	4	2
360	Male	3.44	7.3	0.983023	2018-08-01	1	4	2
361	Male	2.66	6.9	0.903134	2018-08-01	1	4	2
389	Male	2.24	6.6	0.871311	2018-09-01	1	4	2
390	Male	2.09	6.5	0.851833	2018-09-01	1	4	2
391	Male	6.42	8.4	1.19419	2018-09-01	2	4	2
392	Male	1.67	6.2	0.786503	2018-09-01	1	4	2
393	Male	10.66	10.8	0.919229	2018-09-01	2	4	2
394	Male	4.01	8.1	0.833679	2018-09-01	2	4	2
395	Male	3.14	7.5	0.82609	2018-09-01	1	4	2
396	Male	2.54	6.8	0.901777	2018-09-01	1	4	2
397	Male	3.93	8	0.848692	2018-09-01	1	4	2
398	Male	3.12	7.6	0.788235	2018-09-01	1	4	2
399	Male	2.82	7.1	0.877324	2018-09-01	1	4	2
400	Male	2.33	6.7	0.865572	2018-09-01	1	4	2
401	Male	8.76	10.1	0.927246	2018-09-01	2	4	2
402	Male	2.52	7	0.818758	2018-09-01	1	4	2
403	Male	2.8	7	0.909731	2018-09-01	1	4	2
404	Male	2.36	6.6	0.917988	2018-09-01	1	4	2
405	Male	2.19	6.8	0.777516	2018-09-01	1	4	2
406	Male	1.93	6.3	0.865535	2018-09-01	1	4	2
407	Male	1.93	6.4	0.824827	2018-09-01	1	4	2
408	Male	1.97	5.9	1.07979	2018-09-01	1	4	2
409	Male	1.73	6.2	0.81476	2018-09-01	1	4	2
410	Male	1.54	5.8	0.889415	2018-09-01	1	4	2
411	Male	1.46	5.9	0.800252	2018-09-01	1	4	2
419	Male	3.69	7.4	1.01148	2018-10-01	1	4	2
420	Male	4.05	7.9	0.908916	2018-10-01	1	4	2
421	Male	8.27	9.6	1.02246	2018-10-01	2	4	2
422	Male	3.98	7.9	0.893206	2018-10-01	1	4	2
423	Male	2.46	7	0.799264	2018-10-01	1	4	2
424	Male	2.93	7.4	0.803152	2018-10-01	1	4	2
425	Male	3	7	0.974712	2018-10-01	1	4	2
426	Male	4.28	7.9	0.960533	2018-10-01	1	4	2
427	Male	3.03	7.2	0.903176	2018-10-01	1	4	2
428	Male	2.88	7	0.935724	2018-10-01	1	4	2
429	Male	2.95	7	0.958467	2018-10-01	1	4	2
430	Male	2.35	6.5	0.957802	2018-10-01	1	4	2
431	Male	2.67	6.7	0.991878	2018-10-01	1	4	2
432	Male	3.79	7.2	1.12972	2018-10-01	1	4	2
433	Male	3.87	7.7	0.93939	2018-10-01	1	4	2
434	Male	4.55	8.4	0.846352	2018-10-01	2	4	2
435	Male	6.8	9.3	0.926466	2018-10-01	2	4	2
436	Male	6.89	9.4	0.908513	2018-10-01	2	4	2
437	Male	2.35	6.6	0.914098	2018-10-01	1	4	2
438	Male	1.69	6	0.879897	2018-10-01	1	4	2
439	Male	2.31	6.5	0.941499	2018-10-01	1	4	2
440	Male	1.81	6	0.942375	2018-10-01	1	4	2
441	Male	2.03	6.3	0.910381	2018-10-01	1	4	2
442	Male	2.24	6.6	0.871311	2018-10-01	1	4	2
449	Male	2.53	7.1	0.787102	2018-11-01	1	4	2
450	Male	4.41	7.8	1.02904	2018-11-01	1	4	2
451	Male	4.35	8	0.939392	2018-11-01	1	4	2
452	Male	3.72	8	0.803342	2018-11-01	1	4	2
453	Male	1.92	6.5	0.782545	2018-11-01	1	4	2
454	Male	2.95	7	0.958467	2018-11-01	1	4	2
455	Male	8.51	9.5	1.08638	2018-11-01	2	4	2
456	Male	3.02	7.5	0.794519	2018-11-01	1	4	2
457	Male	1.92	6.2	0.904243	2018-11-01	1	4	2
458	Male	2.63	6.8	0.933729	2018-11-01	1	4	2
459	Male	2.11	6.5	0.859984	2018-11-01	1	4	2
460	Male	2.77	7	0.899984	2018-11-01	1	4	2
461	Male	2.23	6.3	1.00007	2018-11-01	1	4	2
479	Male	4.54	8.1	0.943866	2018-12-01	2	4	2
480	Male	8.28	9.9	0.931735	2018-12-01	2	4	2
481	Male	5.08	8.4	0.944938	2018-12-01	2	4	2
482	Male	6.7	9.2	0.943535	2018-12-01	2	4	2
483	Male	9.34	10.2	0.959288	2018-12-01	2	4	2
484	Male	7.4	9.3	1.00821	2018-12-01	2	4	2
485	Male	8.89	10	0.970089	2018-12-01	2	4	2
486	Male	6.31	9	0.950411	2018-12-01	2	4	2
487	Male	5.15	8.3	0.993705	2018-12-01	2	4	2
488	Male	3.32	7.5	0.873445	2018-12-01	1	4	2
489	Male	3.8	7.8	0.886699	2018-12-01	1	4	2
490	Male	6.29	9	0.947399	2018-12-01	2	4	2
491	Male	4.44	8.3	0.856709	2018-12-01	2	4	2
492	Male	9.4	9.9	1.05777	2018-12-01	2	4	2
493	Male	3.38	7.5	0.88923	2018-12-01	1	4	2
494	Male	3.05	7.3	0.871576	2018-12-01	1	4	2
495	Male	3.9	8.2	0.780941	2018-12-01	2	4	2
496	Male	3.28	7.4	0.899092	2018-12-01	1	4	2
497	Male	2.56	6.6	0.995784	2018-12-01	1	4	2
498	Male	4.03	8.1	0.837837	2018-12-01	2	4	2
499	Male	3.67	7.5	0.965525	2018-12-01	1	4	2
500	Male	2.11	6.6	0.820744	2018-12-01	1	4	2
501	Male	2.37	6.7	0.880431	2018-12-01	1	4	2
502	Male	5.66	8.8	0.913175	2018-12-01	2	4	2
503	Male	5.85	8.8	0.943829	2018-12-01	2	4	2
509	Male	5.86	9	0.882632	2019-01-01	2	4	2
510	Male	2.75	7.1	0.855546	2019-01-01	1	4	2
511	Male	5.44	9.2	0.766094	2019-01-01	2	4	2
512	Male	5.73	9	0.863052	2019-01-01	2	4	2
513	Male	2.78	7.2	0.828657	2019-01-01	1	4	2
514	Male	5.69	8.8	0.918015	2019-01-01	2	4	2
515	Male	4.49	7.8	1.0477	2019-01-01	1	4	2
516	Male	2.03	6	1.05692	2019-01-01	1	4	2
517	Male	3.05	7.2	0.909138	2019-01-01	1	4	2
518	Male	3.22	7	1.04619	2019-01-01	1	4	2
519	Male	6.33	9.2	0.891429	2019-01-01	2	4	2
520	Male	6.59	9.3	0.897855	2019-01-01	2	4	2
521	Male	3.59	7.8	0.837697	2019-01-01	1	4	2
522	Male	3.34	7.5	0.878707	2019-01-01	1	4	2
523	Male	5.51	9	0.829915	2019-01-01	2	4	2
524	Male	5	8.7	0.835393	2019-01-01	2	4	2
525	Male	4.75	8.6	0.822191	2019-01-01	2	4	2
526	Male	4	8.1	0.8316	2019-01-01	2	4	2
527	Male	4.22	8.4	0.784968	2019-01-01	2	4	2
528	Male	2.78	7.2	0.828657	2019-01-01	1	4	2
529	Male	4.15	8.7	0.693376	2019-01-01	2	4	2
547	Male	4.3	7.3	1.22878	2019-02-01	1	4	2
548	Male	14.62	11.2	1.12797	2019-02-01	2	4	2
549	Male	6.89	8.7	1.15117	2019-02-01	2	4	2
550	Male	13.59	10.6	1.24085	2019-02-01	2	4	2
551	Male	10.7	10.6	0.976974	2019-02-01	2	4	2
552	Male	4.22	7.8	0.984703	2019-02-01	1	4	2
553	Male	4.55	7.6	1.14951	2019-02-01	1	4	2
554	Male	6.14	8.6	1.06279	2019-02-01	2	4	2
555	Male	3.74	7.4	1.02518	2019-02-01	1	4	2
556	Male	5.71	8.3	1.10176	2019-02-01	2	4	2
557	Male	4.09	7.5	1.07602	2019-02-01	1	4	2
558	Male	10.18	10.3	1.01482	2019-02-01	2	4	2
559	Male	7.65	9.9	0.860842	2019-02-01	2	4	2
560	Male	7.04	9.7	0.843234	2019-02-01	2	4	2
561	Male	2.82	7.3	0.805851	2019-02-01	1	4	2
562	Male	6.4	9	0.963967	2019-02-01	2	4	2
563	Male	3.12	7.5	0.820828	2019-02-01	1	4	2
564	Male	3.25	7.8	0.758361	2019-02-01	1	4	2
565	Male	7.26	9.2	1.0224	2019-02-01	2	4	2
582	Male	6.3	9.5	0.804256	2019-03-01	2	4	2
583	Male	5.54	9.3	0.754797	2019-03-01	2	4	2
584	Male	8.7	10.3	0.867282	2019-03-01	2	4	2
585	Male	8.61	10.1	0.911369	2019-03-01	2	4	2
586	Male	3.02	7.4	0.827822	2019-03-01	1	4	2
587	Male	3.36	7.7	0.815594	2019-03-01	1	4	2
588	Male	8.77	10.3	0.87426	2019-03-01	2	4	2
589	Male	2.75	7.3	0.785847	2019-03-01	1	4	2
590	Male	2.84	7.5	0.747164	2019-03-01	1	4	2
591	Male	10.99	10.8	0.947686	2019-03-01	2	4	2
592	Male	7.92	9.9	0.891225	2019-03-01	2	4	2
593	Male	10.19	10.6	0.930408	2019-03-01	2	4	2
594	Male	10.81	10.9	0.90625	2019-03-01	2	4	2
595	Male	8.52	10.5	0.800814	2019-03-01	2	4	2
596	Male	10.72	11	0.873946	2019-03-01	2	4	2
597	Male	4.53	8.4	0.842632	2019-03-01	2	4	2
598	Male	4.09	8.1	0.850311	2019-03-01	2	4	2
599	Male	4.92	8.6	0.851617	2019-03-01	2	4	2
600	Male	2.9	7.2	0.864426	2019-03-01	1	4	2
601	Male	3.58	7.8	0.835364	2019-03-01	1	4	2
602	Male	4.25	8.1	0.883575	2019-03-01	2	4	2
603	Male	3.55	7.6	0.89687	2019-03-01	1	4	2
604	Male	3.19	7.5	0.839244	2019-03-01	1	4	2
624	Male	3.85	7.9	0.864031	2019-04-01	1	4	2
625	Male	3.08	7.4	0.844269	2019-04-01	1	4	2
626	Male	2.92	7.4	0.800411	2019-04-01	1	4	2
627	Male	2.99	7.1	0.930212	2019-04-01	1	4	2
628	Male	2.94	7.4	0.805893	2019-04-01	1	4	2
629	Male	2.69	7.3	0.768701	2019-04-01	1	4	2
630	Male	2.47	6.8	0.876924	2019-04-01	1	4	2
631	Male	3.23	7.4	0.885386	2019-04-01	1	4	2
632	Male	2.45	6.6	0.952996	2019-04-01	1	4	2
633	Male	3.3	7.6	0.83371	2019-04-01	1	4	2
634	Male	1.91	6.4	0.816279	2019-04-01	1	4	2
635	Male	2.03	6.3	0.910381	2019-04-01	1	4	2
636	Male	11.12	10.7	0.986574	2019-04-01	2	4	2
637	Male	9.76	10.4	0.944615	2019-04-01	2	4	2
638	Male	6.69	9.7	0.801312	2019-04-01	2	4	2
639	Male	9.83	10.6	0.897538	2019-04-01	2	4	2
640	Male	8.37	9.6	1.03483	2019-04-01	2	4	2
641	Male	8.43	10.4	0.815892	2019-04-01	2	4	2
642	Male	5.68	9	0.855521	2019-04-01	2	4	2
660	Male	6.63	8.9	1.03333	2019-05-01	2	4	2
661	Male	8.64	10.3	0.8613	2019-05-01	2	4	2
662	Male	6	9.3	0.81747	2019-05-01	2	4	2
663	Male	6.36	9.4	0.838627	2019-05-01	2	4	2
664	Male	5.58	8.8	0.900268	2019-05-01	2	4	2
665	Male	6.01	9	0.905225	2019-05-01	2	4	2
666	Male	6.57	9.6	0.812284	2019-05-01	2	4	2
667	Male	5.64	8.9	0.879033	2019-05-01	2	4	2
668	Male	7.03	9.8	0.816027	2019-05-01	2	4	2
669	Male	5.14	8.9	0.801104	2019-05-01	2	4	2
670	Male	7.36	9.8	0.854333	2019-05-01	2	4	2
671	Male	7.37	9.5	0.940851	2019-05-01	2	4	2
672	Male	5.47	8.8	0.882521	2019-05-01	2	4	2
673	Male	4.67	8.6	0.808344	2019-05-01	2	4	2
674	Male	4.64	8.4	0.863093	2019-05-01	2	4	2
675	Male	6.87	9.6	0.849374	2019-05-01	2	4	2
676	Male	6.09	9.1	0.886788	2019-05-01	2	4	2
677	Male	5.39	8.9	0.840069	2019-05-01	2	4	2
693	Male	5.02	8.9	0.782402	2019-06-01	2	4	2
694	Male	7.49	9.7	0.897134	2019-06-01	2	4	2
695	Male	6.5	9.3	0.885593	2019-06-01	2	4	2
696	Male	7.29	9.3	0.993226	2019-06-01	2	4	2
697	Male	9.05	10.3	0.902172	2019-06-01	2	4	2
698	Male	7.16	9.3	0.975514	2019-06-01	2	4	2
699	Male	7.51	9.2	1.0576	2019-06-01	2	4	2
700	Male	6.1	9	0.918781	2019-06-01	2	4	2
701	Male	6.21	9.3	0.846082	2019-06-01	2	4	2
702	Male	5.73	8.5	1.02795	2019-06-01	2	4	2
703	Male	6.1	8.8	0.984164	2019-06-01	2	4	2
704	Male	9.96	10.8	0.858867	2019-06-01	2	4	2
705	Male	4.46	8.1	0.927234	2019-06-01	2	4	2
706	Male	7.08	9.4	0.933566	2019-06-01	2	4	2
707	Male	7.73	10.3	0.770585	2019-06-01	2	4	2
708	Male	8.98	10.3	0.895194	2019-06-01	2	4	2
709	Male	9.54	10.3	0.951019	2019-06-01	2	4	2
710	Male	6.38	9.3	0.869243	2019-06-01	2	4	2
711	Male	4.31	8.4	0.801709	2019-06-01	2	4	2
712	Male	6.29	9.1	0.915911	2019-06-01	2	4	2
713	Male	6.39	9.4	0.842583	2019-06-01	2	4	2
21	Female	2.28	6.4	0.974407	2017-07-01	1	4	1
22	Female	2.48	6.8	0.880475	2017-07-01	2	4	1
23	Female	3.94	8	0.850852	2017-07-01	2	4	1
24	Female	2.83	7.2	0.843561	2017-07-01	2	4	1
25	Female	2.43	6.9	0.825044	2017-07-01	2	4	1
26	Female	5.56	8.7	0.928957	2017-07-01	2	4	1
27	Female	3.55	7.9	0.796704	2017-07-01	2	4	1
28	Female	6.6	9.2	0.929452	2017-07-01	2	4	1
29	Female	5.29	9	0.796779	2017-07-01	2	4	1
30	Female	2.01	6.4	0.859017	2017-07-01	1	4	1
34	Female	3.62	7.5	0.952371	2017-08-01	2	4	1
35	Female	2.7	7	0.877241	2017-08-01	2	4	1
36	Female	6.66	9	1.00313	2017-08-01	2	4	1
37	Female	5.19	8.2	1.03925	2017-08-01	2	4	1
38	Female	6.34	8.9	0.988133	2017-08-01	2	4	1
39	Female	6.76	9	1.01819	2017-08-01	2	4	1
40	Female	6.01	8.5	1.07818	2017-08-01	2	4	1
41	Female	3.41	7.1	1.06088	2017-08-01	2	4	1
42	Female	2.22	6.1	1.09885	2017-08-01	1	4	1
43	Female	2.91	6.8	1.03314	2017-08-01	2	4	1
44	Female	2.72	7	0.883739	2017-08-01	2	4	1
45	Female	2.06	6.2	0.970177	2017-08-01	1	4	1
46	Female	2.23	6.2	1.05024	2017-08-01	1	4	1
47	Female	2.44	6.4	1.04279	2017-08-01	1	4	1
48	Female	4.97	8.2	0.995199	2017-08-01	2	4	1
49	Female	3.97	7.5	1.04445	2017-08-01	2	4	1
50	Female	2.28	6.5	0.929272	2017-08-01	1	4	1
51	Female	1.75	6	0.911136	2017-08-01	1	4	1
52	Female	2.37	6.2	1.11617	2017-08-01	1	4	1
53	Female	2.19	6.1	1.084	2017-08-01	1	4	1
54	Female	1.67	5.5	1.13464	2017-08-01	1	4	1
55	Female	2.05	6.1	1.01471	2017-08-01	1	4	1
56	Female	2.94	7	0.955218	2017-08-01	2	4	1
57	Female	1.77	5.7	1.07811	2017-08-01	1	4	1
58	Female	2.08	6.1	1.02955	2017-08-01	1	4	1
59	Female	2.24	6.2	1.05495	2017-08-01	1	4	1
60	Female	1.56	5.7	0.950197	2017-08-01	1	4	1
89	Female	4.97	8.55	0.875754	2017-09-01	2	4	1
90	Female	3.48	7.4	0.953914	2017-09-01	2	4	1
91	Female	5.47	8.2	1.09532	2017-09-01	2	4	1
106	Female	3.04	7.2	0.906157	2017-10-01	2	4	1
107	Female	3.8	7.5	0.999727	2017-10-01	2	4	1
108	Female	6.16	8.8	0.993844	2017-10-01	2	4	1
109	Female	2.21	6.2	1.04082	2017-10-01	1	4	1
110	Female	3.11	7	1.01045	2017-10-01	2	4	1
124	Female	1.85	6	0.963201	2017-11-01	1	4	1
125	Female	2.61	6.7	0.969589	2017-11-01	1	4	1
126	Female	2.48	6.5	1.01079	2017-11-01	1	4	1
127	Female	4.23	8.3	0.816189	2017-11-01	2	4	1
128	Female	3.04	6.9	1.03215	2017-11-01	2	4	1
129	Female	2.36	6.9	0.801277	2017-11-01	2	4	1
130	Female	1.93	5.7	1.17556	2017-11-01	1	4	1
131	Female	3.35	7.5	0.881338	2017-11-01	2	4	1
132	Female	2.33	6.6	0.906319	2017-11-01	1	4	1
143	Female	1.65	5.8	0.952945	2017-12-01	1	4	1
144	Female	2.2	6.4	0.940217	2017-12-01	1	4	1
145	Female	3.46	7.7	0.839868	2017-12-01	2	4	1
146	Female	3.14	7.1	0.976878	2017-12-01	2	4	1
147	Female	2.1	6.1	1.03945	2017-12-01	1	4	1
148	Female	4.52	8	0.976104	2017-12-01	2	4	1
149	Female	2.61	6.4	1.11544	2017-12-01	1	4	1
150	Female	3.29	6.9	1.11703	2017-12-01	2	4	1
151	Female	2.11	6.2	0.993725	2017-12-01	1	4	1
152	Female	2.89	6.6	1.12415	2017-12-01	1	4	1
153	Female	2.98	6.9	1.01178	2017-12-01	2	4	1
154	Female	3.97	7.5	1.04445	2017-12-01	2	4	1
155	Female	1.5	5.5	1.01914	2017-12-01	1	4	1
156	Female	1.93	6.2	0.908952	2017-12-01	1	4	1
157	Female	2.4	6.5	0.978181	2017-12-01	1	4	1
158	Female	2.3	6.2	1.08321	2017-12-01	1	4	1
166	Female	4.32	8	0.932914	2018-01-01	2	4	2
167	Female	4.31	8	0.930754	2018-01-01	2	4	2
168	Female	3.56	7.5	0.936586	2018-01-01	2	4	2
169	Female	4.31	7.6	1.08888	2018-01-01	2	4	2
170	Female	4.15	7.9	0.931358	2018-01-01	2	4	2
171	Female	1.95	6.1	0.965207	2018-01-01	1	4	2
172	Female	2.66	6.8	0.94438	2018-01-01	2	4	2
173	Female	5.01	8	1.08192	2018-01-01	2	4	2
174	Female	2.5	6.5	1.01894	2018-01-01	1	4	2
175	Female	3.63	7.5	0.955002	2018-01-01	2	4	2
192	Female	1.63	6.1	0.806814	2018-02-01	1	4	2
193	Female	4.58	8	0.989061	2018-02-01	2	4	2
194	Female	3.62	7.5	0.952371	2018-02-01	2	4	2
195	Female	3.5	7.6	0.884238	2018-02-01	2	4	2
196	Female	2.08	6.3	0.932804	2018-02-01	1	4	2
197	Female	6.44	8.9	1.00372	2018-02-01	2	4	2
223	Female	4.43	7.9	0.994197	2018-03-01	2	4	2
224	Female	5.45	8.4	1.01376	2018-03-01	2	4	2
225	Female	4.24	8	0.915638	2018-03-01	2	4	2
226	Female	2.36	6.7	0.876717	2018-03-01	1	4	2
227	Female	3.25	7.2	0.968753	2018-03-01	2	4	2
228	Female	3.72	7.8	0.868032	2018-03-01	2	4	2
229	Female	3.3	6.9	1.12043	2018-03-01	2	4	2
230	Female	2.91	7.2	0.867407	2018-03-01	2	4	2
231	Female	2.59	6.7	0.962159	2018-03-01	1	4	2
232	Female	1.21	5.4	0.869567	2018-03-01	1	4	2
257	Female	1.7	5.8	0.981822	2018-04-01	1	4	2
258	Female	1.39	5.6	0.893753	2018-04-01	1	4	2
259	Female	2.34	6.2	1.10205	2018-04-01	1	4	2
260	Female	2.8	6.8	0.994084	2018-04-01	2	4	2
261	Female	1.81	5.9	0.992093	2018-04-01	1	4	2
262	Female	2.19	6.2	1.0314	2018-04-01	1	4	2
263	Female	4.93	8.2	0.987189	2018-04-01	2	4	2
264	Female	2.94	6.8	1.04379	2018-04-01	2	4	2
265	Female	2.81	6.9	0.954063	2018-04-01	2	4	2
266	Female	3.75	7.4	1.02793	2018-04-01	2	4	2
267	Female	2.56	6.7	0.951015	2018-04-01	1	4	2
268	Female	1.63	5.7	0.992834	2018-04-01	1	4	2
289	Female	3.01	7	0.977961	2018-05-01	2	4	2
290	Female	3.22	7.4	0.882645	2018-05-01	2	4	2
291	Female	3.32	7.3	0.948732	2018-05-01	2	4	2
292	Female	4.7	7.9	1.05479	2018-05-01	2	4	2
293	Female	3.62	7.7	0.878706	2018-05-01	2	4	2
294	Female	4.07	7.3	1.16305	2018-05-01	2	4	2
295	Female	3.21	7.4	0.879904	2018-05-01	2	4	2
296	Female	3.01	6.9	1.02197	2018-05-01	2	4	2
297	Female	2.32	6.4	0.991502	2018-05-01	1	4	2
312	Female	8.16	9.1	1.18821	2018-06-01	2	4	2
313	Female	5.35	8.3	1.0323	2018-06-01	2	4	2
314	Female	6.23	8.7	1.0409	2018-06-01	2	4	2
315	Female	5.76	8.4	1.07143	2018-06-01	2	4	2
316	Female	4.91	7.9	1.10192	2018-06-01	2	4	2
317	Female	3.82	7.5	1.00499	2018-06-01	2	4	2
318	Female	4.2	8	0.906999	2018-06-01	2	4	2
319	Female	8.75	10.2	0.89869	2018-06-01	2	4	2
320	Female	5.23	8.4	0.97284	2018-06-01	2	4	2
321	Female	4.82	8.4	0.896575	2018-06-01	2	4	2
322	Female	4.46	7.9	1.00093	2018-06-01	2	4	2
323	Female	4.07	7.7	0.987937	2018-06-01	2	4	2
324	Female	4.48	6.8	1.59054	2018-06-01	2	4	2
325	Female	3.19	7	1.03644	2018-06-01	2	4	2
326	Female	2.91	7	0.945471	2018-06-01	2	4	2
327	Female	3.49	7.5	0.91817	2018-06-01	2	4	2
328	Female	3	6.9	1.01857	2018-06-01	2	4	2
347	Female	1.72	6	0.895517	2018-07-01	1	4	2
348	Female	1.46	5.5	0.991958	2018-07-01	1	4	2
349	Female	1.48	5.6	0.951622	2018-07-01	1	4	2
350	Female	5.76	8.5	1.03333	2018-07-01	2	4	2
351	Female	4.08	8	0.881085	2018-07-01	2	4	2
352	Female	3.37	6.8	1.19645	2018-07-01	2	4	2
353	Female	1.89	6	0.984027	2018-07-01	1	4	2
354	Female	2.72	6.7	1.01045	2018-07-01	1	4	2
355	Female	3.07	7.2	0.915099	2018-07-01	2	4	2
356	Female	2.36	6.5	0.961878	2018-07-01	1	4	2
357	Female	1.8	6	0.937169	2018-07-01	1	4	2
358	Female	1.83	6	0.952788	2018-07-01	1	4	2
362	Female	3.62	7.5	0.952371	2018-08-01	2	4	2
363	Female	2.7	7	0.877241	2018-08-01	2	4	2
364	Female	6.66	9	1.00313	2018-08-01	2	4	2
365	Female	5.19	8.2	1.03925	2018-08-01	2	4	2
366	Female	6.34	8.9	0.988133	2018-08-01	2	4	2
367	Female	6.76	9	1.01819	2018-08-01	2	4	2
368	Female	6.01	8.5	1.07818	2018-08-01	2	4	2
369	Female	3.41	7.1	1.06088	2018-08-01	2	4	2
370	Female	2.22	6.1	1.09885	2018-08-01	1	4	2
371	Female	2.91	6.8	1.03314	2018-08-01	2	4	2
372	Female	2.72	7	0.883739	2018-08-01	2	4	2
373	Female	2.06	6.2	0.970177	2018-08-01	1	4	2
374	Female	2.23	6.2	1.05024	2018-08-01	1	4	2
375	Female	2.44	6.4	1.04279	2018-08-01	1	4	2
376	Female	4.97	8.2	0.995199	2018-08-01	2	4	2
377	Female	3.97	7.5	1.04445	2018-08-01	2	4	2
378	Female	2.28	6.5	0.929272	2018-08-01	1	4	2
379	Female	1.75	6	0.911136	2018-08-01	1	4	2
380	Female	2.37	6.2	1.11617	2018-08-01	1	4	2
381	Female	2.19	6.1	1.084	2018-08-01	1	4	2
382	Female	1.67	5.5	1.13464	2018-08-01	1	4	2
383	Female	2.05	6.1	1.01471	2018-08-01	1	4	2
384	Female	2.94	7	0.955218	2018-08-01	2	4	2
385	Female	1.77	5.7	1.07811	2018-08-01	1	4	2
386	Female	2.08	6.1	1.02955	2018-08-01	1	4	2
387	Female	2.24	6.2	1.05495	2018-08-01	1	4	2
388	Female	1.56	5.7	0.950197	2018-08-01	1	4	2
412	Female	2.25	6.5	0.917045	2018-09-01	1	4	2
413	Female	1.76	6.2	0.828889	2018-09-01	1	4	2
414	Female	1.4	5.7	0.85274	2018-09-01	1	4	2
415	Female	1.95	6.5	0.794772	2018-09-01	1	4	2
416	Female	1.44	5.6	0.925903	2018-09-01	1	4	2
417	Female	2.87	7	0.932475	2018-09-01	2	4	2
418	Female	1.39	5.7	0.846649	2018-09-01	1	4	2
443	Female	5.19	8.2	1.03925	2018-10-01	2	4	2
444	Female	6.74	9.2	0.949168	2018-10-01	2	4	2
445	Female	4.51	8.2	0.903088	2018-10-01	2	4	2
446	Female	2.57	7	0.835003	2018-10-01	2	4	2
447	Female	5.86	9	0.882632	2018-10-01	2	4	2
448	Female	1.43	5.8	0.825885	2018-10-01	1	4	2
462	Female	2.21	6.2	1.04082	2018-11-01	1	4	2
463	Female	5.16	8	1.11431	2018-11-01	2	4	2
464	Female	3.69	7.5	0.970787	2018-11-01	2	4	2
465	Female	4.92	8.6	0.851617	2018-11-01	2	4	2
466	Female	2.57	7.1	0.799547	2018-11-01	2	4	2
468	Female	4.75	8.5	0.85214	2018-11-01	2	4	2
469	Female	5.29	8.6	0.915661	2018-11-01	2	4	2
470	Female	1.99	6.2	0.93721	2018-11-01	1	4	2
471	Female	2.68	7	0.870743	2018-11-01	2	4	2
472	Female	3.05	7.5	0.802412	2018-11-01	2	4	2
473	Female	4.01	7.8	0.935701	2018-11-01	2	4	2
474	Female	4.55	8.5	0.816261	2018-11-01	2	4	2
475	Female	2.45	6.5	0.99856	2018-11-01	1	4	2
476	Female	3.54	7.6	0.894344	2018-11-01	2	4	2
477	Female	2.19	6.5	0.89259	2018-11-01	1	4	2
478	Female	1.65	6	0.859071	2018-11-01	1	4	2
504	Female	2.54	6.8	0.901777	2018-12-01	2	4	2
505	Female	2.23	6.6	0.867421	2018-12-01	1	4	2
506	Female	3.11	7.2	0.927023	2018-12-01	2	4	2
507	Female	5.8	8.6	1.00394	2018-12-01	2	4	2
508	Female	2.84	6.8	1.00829	2018-12-01	2	4	2
530	Female	2.72	7	0.883739	2019-01-01	2	4	2
531	Female	4.65	8	1.00418	2019-01-01	2	4	2
532	Female	3.22	7.3	0.920156	2019-01-01	2	4	2
533	Female	4.89	8.2	0.979179	2019-01-01	2	4	2
534	Female	2.69	6.8	0.955031	2019-01-01	2	4	2
535	Female	4.46	8.1	0.927234	2019-01-01	2	4	2
536	Female	2.61	6.8	0.926629	2019-01-01	2	4	2
537	Female	3.34	7.3	0.954447	2019-01-01	2	4	2
538	Female	3.43	7.5	0.902385	2019-01-01	2	4	2
539	Female	4.64	8.5	0.832407	2019-01-01	2	4	2
540	Female	4.38	7.8	1.02204	2019-01-01	2	4	2
541	Female	3.64	7.5	0.957633	2019-01-01	2	4	2
542	Female	3.76	7.9	0.843833	2019-01-01	2	4	2
543	Female	3.87	7.7	0.93939	2019-01-01	2	4	2
544	Female	3.52	6.6	1.3692	2019-01-01	1	4	2
545	Female	3.69	6.8	1.31006	2019-01-01	2	4	2
546	Female	3.38	7.3	0.965878	2019-01-01	2	4	2
566	Female	4.87	7.8	1.13637	2019-02-01	2	4	2
567	Female	7.31	9.1	1.06444	2019-02-01	2	4	2
568	Female	10.86	10.3	1.08261	2019-02-01	2	4	2
569	Female	10.04	10	1.09558	2019-02-01	2	4	2
570	Female	4.63	7.6	1.16972	2019-02-01	2	4	2
571	Female	4.57	7.5	1.2023	2019-02-01	2	4	2
572	Female	1.25	5.2	1.00824	2019-02-01	1	4	2
573	Female	1.47	5.4	1.05642	2019-02-01	1	4	2
574	Female	5.97	8.5	1.07101	2019-02-01	2	4	2
575	Female	5.55	8.2	1.11134	2019-02-01	2	4	2
576	Female	4.14	7.6	1.04593	2019-02-01	2	4	2
577	Female	2.42	7	0.786268	2019-02-01	2	4	2
578	Female	8.22	8.9	1.28114	2019-02-01	2	4	2
579	Female	5.59	9.1	0.813981	2019-02-01	2	4	2
580	Female	6.39	9.6	0.790029	2019-02-01	2	4	2
581	Female	5.53	8.4	1.02864	2019-02-01	2	4	2
605	Female	3.76	8.2	0.752907	2019-03-01	2	4	2
606	Female	5.38	8.6	0.93124	2019-03-01	2	4	2
607	Female	3.37	7.4	0.923762	2019-03-01	2	4	2
608	Female	3.23	7.5	0.849768	2019-03-01	2	4	2
609	Female	3.99	8.2	0.798962	2019-03-01	2	4	2
610	Female	3.08	7.8	0.718693	2019-03-01	2	4	2
611	Female	4.04	8.5	0.724768	2019-03-01	2	4	2
612	Female	3.89	7.8	0.9077	2019-03-01	2	4	2
613	Female	2.33	6.8	0.82722	2019-03-01	2	4	2
614	Female	4.33	8.3	0.835484	2019-03-01	2	4	2
615	Female	5.19	9.3	0.707112	2019-03-01	2	4	2
616	Female	6.31	9.7	0.755796	2019-03-01	2	4	2
617	Female	5.46	9.4	0.719954	2019-03-01	2	4	2
618	Female	3.61	8	0.779588	2019-03-01	2	4	2
619	Female	5.2	8.8	0.838959	2019-03-01	2	4	2
620	Female	4.77	9	0.718457	2019-03-01	2	4	2
621	Female	2.24	6.8	0.795268	2019-03-01	2	4	2
622	Female	2.72	7	0.883739	2019-03-01	2	4	2
623	Female	4.36	8.1	0.906444	2019-03-01	2	4	2
643	Female	3.21	7.3	0.917298	2019-04-01	2	4	2
644	Female	2.78	7.1	0.864879	2019-04-01	2	4	2
645	Female	4.49	8.5	0.805497	2019-04-01	2	4	2
646	Female	2.34	6.3	1.04941	2019-04-01	1	4	2
647	Female	4.16	7.5	1.09444	2019-04-01	2	4	2
648	Female	5.41	8.7	0.903895	2019-04-01	2	4	2
649	Female	3.34	7.8	0.779362	2019-04-01	2	4	2
650	Female	3.64	7.8	0.849364	2019-04-01	2	4	2
651	Female	4.64	8.5	0.832407	2019-04-01	2	4	2
652	Female	4.41	8.2	0.883064	2019-04-01	2	4	2
653	Female	4.43	8.1	0.920997	2019-04-01	2	4	2
654	Female	3.03	6.7	1.12561	2019-04-01	1	4	2
655	Female	8.38	9.1	1.22024	2019-04-01	2	4	2
656	Female	1.5	6	0.780974	2019-04-01	1	4	2
657	Female	2.66	7.3	0.760129	2019-04-01	2	4	2
658	Female	2.13	6.8	0.756214	2019-04-01	2	4	2
659	Female	2.82	6.3	1.26467	2019-04-01	1	4	2
678	Female	1.91	6.3	0.856566	2019-05-01	1	4	2
679	Female	1.76	6.3	0.789296	2019-05-01	1	4	2
680	Female	1.94	6.7	0.720691	2019-05-01	1	4	2
681	Female	3.86	8.1	0.802494	2019-05-01	2	4	2
682	Female	2.43	6.9	0.825044	2019-05-01	2	4	2
683	Female	2.1	6.4	0.89748	2019-05-01	1	4	2
684	Female	2.35	7.1	0.731103	2019-05-01	2	4	2
685	Female	2.5	7.2	0.745195	2019-05-01	2	4	2
686	Female	2.07	6.5	0.843681	2019-05-01	1	4	2
687	Female	2.14	6.8	0.759765	2019-05-01	2	4	2
688	Female	4.74	8.4	0.881694	2019-05-01	2	4	2
689	Female	3.82	8.4	0.710564	2019-05-01	2	4	2
690	Female	2.02	6.8	0.717161	2019-05-01	2	4	2
691	Female	6.14	9.2	0.864672	2019-05-01	2	4	2
692	Female	4.92	8.3	0.949326	2019-05-01	2	4	2
714	Female	2.79	7.2	0.831638	2019-06-01	2	4	2
715	Female	2.56	6.6	0.995784	2019-06-01	1	4	2
716	Female	3.1	7.2	0.924042	2019-06-01	2	4	2
717	Female	2.76	6.9	0.937087	2019-06-01	2	4	2
718	Female	2.72	6.7	1.01045	2019-06-01	1	4	2
719	Female	2.04	6.3	0.914866	2019-06-01	1	4	2
720	Female	3.75	7.3	1.07161	2019-06-01	2	4	2
721	Female	1.73	6	0.900723	2019-06-01	1	4	2
722	Female	6.9	9.2	0.9717	2019-06-01	2	4	2
723	Female	5.31	8.8	0.856706	2019-06-01	2	4	2
724	Female	4.68	8.5	0.839582	2019-06-01	2	4	2
726	Female	5.11	7.2	1.52318	2019-06-01	2	4	2
727	Female	3.38	7.6	0.853921	2019-06-01	2	4	2
728	Female	4.35	8.4	0.80915	2019-06-01	2	4	2
729	Female	3.82	7.8	0.891366	2019-06-01	2	4	2
730	Female	4.19	7.9	0.940335	2019-06-01	2	4	2
1	Male	7.26	9.9	0.816956	2017-07-01	2	3	1
2	Male	2.86	7.45	0.76798	2017-07-01	1	3	1
3	Male	6.47	9.7	0.77496	2017-07-01	2	3	1
4	Male	2.89	7.55	0.74502	2017-07-01	2	3	1
5	Male	2.88	7.6	0.727602	2017-07-01	2	3	1
6	Male	2.81	7.3	0.802993	2017-07-01	1	3	1
7	Male	2.83	7.4	0.775741	2017-07-01	1	3	1
8	Male	3.58	8.05	0.758514	2017-07-01	2	3	1
9	Male	2.34	7	0.760275	2017-07-01	1	3	1
10	Male	3.2	7.6	0.808446	2017-07-01	2	3	1
11	Male	2.52	6.8	0.894676	2017-07-01	1	3	1
12	Male	2.86	7.5	0.752426	2017-07-01	2	3	1
13	Male	3.08	7.77	0.727215	2017-07-01	2	3	1
20	Male	2.51	6.9	0.852206	2017-07-01	1	3	1
21	Male	5.91	9.5	0.754468	2017-07-01	2	3	1
23	Male	5.3	8.8	0.855093	2017-08-01	2	3	1
24	Male	5.73	9.4	0.755556	2017-08-01	2	3	1
25	Male	7.5	10.5	0.704942	2017-08-01	2	3	1
26	Male	6.06	9.2	0.853406	2017-08-01	2	3	1
27	Male	5.29	8.8	0.85348	2017-08-01	2	3	1
28	Male	3.83	8	0.827097	2017-08-01	2	3	1
29	Male	3.62	8	0.781747	2017-08-01	2	3	1
30	Male	3.44	8	0.742876	2017-08-01	2	3	1
31	Male	3.28	7.6	0.828658	2017-08-01	2	3	1
32	Male	3.48	7.5	0.915539	2017-08-01	2	3	1
33	Male	3.74	7.5	0.983941	2017-08-01	2	3	1
34	Male	2.37	6.8	0.841421	2017-08-01	1	3	1
35	Male	2.78	7	0.903233	2017-08-01	1	3	1
40	Male	3.01	7.6	0.760445	2017-09-01	2	3	1
41	Male	4.05	8.1	0.841995	2017-09-01	2	3	1
42	Male	4.17	8.2	0.835006	2017-09-01	2	3	1
43	Male	3.21	7.1	0.998656	2017-09-01	1	3	1
44	Male	3.52	7.8	0.821363	2017-09-01	2	3	1
45	Male	4.03	8.1	0.837837	2017-09-01	2	3	1
46	Male	5.68	9.1	0.827086	2017-09-01	2	3	1
47	Male	2.02	6.4	0.86329	2017-09-01	1	3	1
48	Male	7.31	9.7	0.875574	2017-09-01	2	3	1
49	Male	2.51	6.7	0.93244	2017-09-01	1	3	1
54	Male	8.08	9.5	1.03149	2017-10-01	2	3	1
55	Male	7	9	1.05434	2017-10-01	2	3	1
56	Male	7.36	9	1.10856	2017-10-01	2	3	1
57	Male	7.6	9.6	0.939628	2017-10-01	2	3	1
58	Male	3.86	7.5	1.01551	2017-10-01	2	3	1
59	Male	2.83	6.9	0.960853	2017-10-01	1	3	1
60	Male	5.09	8.5	0.913136	2017-10-01	2	3	1
61	Male	4.17	8.1	0.866943	2017-10-01	2	3	1
62	Male	7.13	9.4	0.940159	2017-10-01	2	3	1
63	Male	6.9	9.4	0.909832	2017-10-01	2	3	1
64	Male	7.43	9.4	0.979717	2017-10-01	2	3	1
65	Male	4	7.7	0.970946	2017-10-01	2	3	1
66	Male	4.71	8	1.01714	2017-10-01	2	3	1
67	Male	3.9	7.4	1.06904	2017-10-01	1	3	1
74	Male	8.05	9.7	0.964209	2017-11-01	2	3	1
75	Male	9.15	11.2	0.705949	2017-11-01	2	3	1
76	Male	7.1	9.8	0.824153	2017-11-01	2	3	1
77	Male	1.92	6.8	0.681658	2017-11-01	1	3	1
86	Male	4.57	8.5	0.819849	2017-11-01	2	3	1
87	Male	6.85	9	1.03175	2017-11-01	2	3	1
90	Male	10.16	11	0.828292	2017-12-01	2	3	1
91	Male	9.64	10.5	0.906085	2017-12-01	2	3	1
92	Male	13.73	11.2	1.05931	2017-12-01	2	3	1
93	Male	11.03	10.5	1.03673	2017-12-01	2	3	1
94	Male	10.44	10.2	1.07227	2017-12-01	2	3	1
95	Male	13.57	11.3	1.01888	2017-12-01	2	3	1
96	Male	11.41	10.7	1.0123	2017-12-01	2	3	1
97	Male	6.16	9	0.927818	2017-12-01	2	3	1
98	Male	13.24	11.3	0.994102	2017-12-01	2	3	1
99	Male	10.89	10.5	1.02358	2017-12-01	2	3	1
100	Male	9.47	10	1.03338	2017-12-01	2	3	1
101	Male	10.69	10	1.16651	2017-12-01	2	3	1
102	Male	7.84	9.5	1.00085	2017-12-01	2	3	1
103	Male	10.12	10.5	0.951201	2017-12-01	2	3	1
104	Male	10.63	10.2	1.09178	2017-12-01	2	3	1
105	Male	8.79	10	0.959177	2017-12-01	2	3	1
106	Male	8.16	10	0.890431	2017-12-01	2	3	1
107	Male	5.06	8.4	0.941218	2017-12-01	2	3	1
108	Male	3.38	7.5	0.88923	2017-12-01	2	3	1
119	Male	3.62	7.1	1.12621	2018-01-01	1	3	2
120	Male	2.64	6.5	1.076	2018-01-01	1	3	2
121	Male	4.17	7.5	1.09707	2018-01-01	2	3	2
122	Male	3.63	7	1.1794	2018-01-01	1	3	2
123	Male	3.45	7	1.12092	2018-01-01	1	3	2
124	Male	7.88	9.5	1.00596	2018-01-01	2	3	2
125	Male	11.57	10.1	1.22468	2018-01-01	2	3	2
126	Male	11.87	9.5	1.51532	2018-01-01	2	3	2
127	Male	9.52	8.6	1.64784	2018-01-01	2	3	2
128	Male	4.83	7.8	1.12704	2018-01-01	2	3	2
129	Male	8.13	9.5	1.03787	2018-01-01	2	3	2
130	Male	10.11	10	1.10322	2018-01-01	2	3	2
131	Male	10.14	10.2	1.04145	2018-01-01	2	3	2
132	Male	2.92	7	0.94872	2018-01-01	1	3	2
146	Male	10.16	11	0.828292	2018-02-01	2	3	2
147	Male	9.64	10.5	0.906085	2018-02-01	2	3	2
148	Male	13.73	11.2	1.05931	2018-02-01	2	3	2
149	Male	11.03	10.5	1.03673	2018-02-01	2	3	2
150	Male	10.44	10.2	1.07227	2018-02-01	2	3	2
151	Male	13.57	11.3	1.01888	2018-02-01	2	3	2
152	Male	11.41	10.7	1.0123	2018-02-01	2	3	2
153	Male	6.16	9	0.927818	2018-02-01	2	3	2
154	Male	13.24	11.3	0.994102	2018-02-01	2	3	2
155	Male	10.89	10.5	1.02358	2018-02-01	2	3	2
156	Male	9.47	10	1.03338	2018-02-01	2	3	2
157	Male	10.69	10	1.16651	2018-02-01	2	3	2
158	Male	7.84	9.5	1.00085	2018-02-01	2	3	2
159	Male	10.12	10.5	0.951201	2018-02-01	2	3	2
160	Male	10.63	10.2	1.09178	2018-02-01	2	3	2
161	Male	8.79	10	0.959177	2018-02-01	2	3	2
162	Male	8.16	10	0.890431	2018-02-01	2	3	2
163	Male	5.06	8.4	0.941218	2018-02-01	2	3	2
164	Male	3.38	7.5	0.88923	2018-02-01	2	3	2
175	Male	11.17	10.5	1.04989	2018-03-01	2	3	2
176	Male	13.59	10.9	1.13931	2018-03-01	2	3	2
177	Male	10.04	10.4	0.971715	2018-03-01	2	3	2
178	Male	6.65	9.2	0.936493	2018-03-01	2	3	2
179	Male	9.68	10	1.0563	2018-03-01	2	3	2
180	Male	11.87	10.7	1.05311	2018-03-01	2	3	2
181	Male	3.25	7.2	0.968753	2018-03-01	1	3	2
182	Male	11.76	10.6	1.07376	2018-03-01	2	3	2
183	Male	14.2	11.5	1.01047	2018-03-01	2	3	2
184	Male	10.41	10.2	1.06918	2018-03-01	2	3	2
185	Male	12.08	10.5	1.13543	2018-03-01	2	3	2
189	Male	8.41	9.6	1.03977	2018-04-01	2	3	2
190	Male	9.19	10.1	0.972762	2018-04-01	2	3	2
191	Male	2.63	6.9	0.892948	2018-04-01	1	3	2
192	Male	4.94	8.2	0.989192	2018-04-01	2	3	2
193	Male	8.44	9.2	1.18857	2018-04-01	2	3	2
194	Male	3.89	7.6	0.982768	2018-04-01	2	3	2
195	Male	6.06	8.7	1.0125	2018-04-01	2	3	2
196	Male	3.62	7.4	0.99229	2018-04-01	1	3	2
197	Male	2.97	7	0.964965	2018-04-01	1	3	2
198	Male	2.79	7	0.906482	2018-04-01	1	3	2
199	Male	2.68	7	0.870743	2018-04-01	1	3	2
200	Male	2.88	7	0.935724	2018-04-01	1	3	2
221	Male	6.41	8.3	1.23682	2018-05-01	2	3	2
222	Male	4.54	8	0.980423	2018-05-01	2	3	2
223	Male	6.03	8.8	0.97287	2018-05-01	2	3	2
224	Male	8.29	9.6	1.02494	2018-05-01	2	3	2
225	Male	3.99	7.7	0.968518	2018-05-01	2	3	2
226	Male	2.73	7	0.886988	2018-05-01	1	3	2
227	Male	2.69	6.9	0.91332	2018-05-01	1	3	2
228	Male	6.64	8.9	1.03489	2018-05-01	2	3	2
229	Male	4.4	7.7	1.06804	2018-05-01	2	3	2
230	Male	2.55	7	0.828505	2018-05-01	1	3	2
231	Male	3.54	7.6	0.894344	2018-05-01	2	3	2
232	Male	4.7	8	1.01498	2018-05-01	2	3	2
233	Male	3	7.1	0.933323	2018-05-01	1	3	2
235	Male	3.7	7.7	0.898125	2018-05-01	2	3	2
236	Male	3.25	7.4	0.890868	2018-05-01	1	3	2
237	Male	3.76	7.6	0.949924	2018-05-01	2	3	2
238	Male	3.58	7.5	0.941848	2018-05-01	2	3	2
239	Male	2.01	6.2	0.946629	2018-05-01	1	3	2
240	Male	2.41	6.5	0.982257	2018-05-01	1	3	2
242	Male	4	7.7	0.970946	2018-05-01	2	3	2
243	Male	4.39	8	0.94803	2018-05-01	2	3	2
244	Male	3.69	7.5	0.970787	2018-05-01	2	3	2
246	Male	4.13	8	0.891883	2018-05-01	2	3	2
247	Male	4.38	8	0.945871	2018-05-01	2	3	2
248	Male	5.09	8.6	0.881043	2018-05-01	2	3	2
249	Male	10.72	10.6	0.9788	2018-05-01	2	3	2
250	Male	11.98	10.8	1.03306	2018-05-01	2	3	2
251	Male	10.84	10.4	1.04914	2018-05-01	2	3	2
252	Male	5.26	8.5	0.943633	2018-05-01	2	3	2
253	Male	12.53	11.2	0.966725	2018-05-01	2	3	2
254	Male	7.85	9.5	1.00213	2018-06-01	2	3	2
255	Male	8.73	9.8	1.01336	2018-06-01	2	3	2
256	Male	9.92	10.5	0.932403	2018-06-01	2	3	2
257	Male	8	9.7	0.95822	2018-06-01	2	3	2
258	Male	1.63	5.7	0.992834	2018-06-01	1	3	2
259	Male	2.07	6.3	0.92832	2018-06-01	1	3	2
260	Male	2.41	6.2	1.13501	2018-06-01	1	3	2
262	Male	2.04	6	1.06212	2018-06-01	1	3	2
263	Male	1.73	5.6	1.11237	2018-06-01	1	3	2
264	Male	2.19	6.2	1.0314	2018-06-01	1	3	2
265	Male	2.43	6.6	0.945217	2018-06-01	1	3	2
266	Male	2.62	6.2	1.23391	2018-06-01	1	3	2
267	Male	3.52	7.5	0.926062	2018-06-01	2	3	2
268	Male	1.73	5.9	0.948243	2018-06-01	1	3	2
269	Male	2.05	6.2	0.965468	2018-06-01	1	3	2
270	Male	1.96	6.1	0.970157	2018-06-01	1	3	2
281	Male	9.28	10.1	0.982288	2018-07-01	2	2	2
282	Male	10.34	10.5	0.97188	2018-07-01	2	3	2
283	Male	8.82	9.7	1.05644	2018-07-01	2	3	2
285	Male	5.01	8.3	0.966691	2018-07-01	2	3	2
286	Male	6	8.9	0.935141	2018-07-01	2	3	2
287	Male	3.39	7.2	1.01048	2018-07-01	1	3	2
288	Male	5.04	8.3	0.97248	2018-07-01	2	3	2
289	Male	4.54	8	0.980423	2018-07-01	2	3	2
290	Male	5.34	8.4	0.993301	2018-07-01	2	3	2
291	Male	4.7	7.6	1.18741	2018-07-01	2	3	2
292	Male	4.45	8	0.960988	2018-07-01	2	3	2
293	Male	4.57	8.1	0.950103	2018-07-01	2	3	2
294	Male	4.71	8.1	0.979209	2018-07-01	2	3	2
295	Male	2.83	6.9	0.960853	2018-07-01	1	3	2
296	Male	4.9	8.2	0.981182	2018-07-01	2	3	2
297	Male	4.77	8.1	0.991683	2018-07-01	2	3	2
298	Male	4.43	8	0.956668	2018-07-01	2	3	2
299	Male	3	7.3	0.857288	2018-07-01	1	3	2
311	Male	8	9.7	0.95822	2018-08-01	2	3	2
312	Male	10.36	10.5	0.973759	2018-08-01	2	3	2
313	Male	10.39	10.7	0.921808	2018-08-01	2	3	2
314	Male	4.66	8.3	0.899158	2018-08-01	2	3	2
315	Male	9.89	10.4	0.957197	2018-08-01	2	3	2
316	Male	9.02	10.3	0.899182	2018-08-01	2	3	2
317	Male	9.94	10.4	0.962036	2018-08-01	2	3	2
318	Male	10	10.5	0.939922	2018-08-01	2	3	2
319	Male	11.17	11	0.910632	2018-08-01	2	3	2
320	Male	4.86	8.8	0.784104	2018-08-01	2	3	2
321	Male	9.7	10.2	0.996263	2018-08-01	2	3	2
322	Male	9.15	10	0.998461	2018-08-01	2	3	2
323	Male	8.09	10.2	0.830904	2018-08-01	2	3	2
326	Male	7.37	9.3	1.00413	2018-08-01	2	3	2
327	Male	4.03	7.9	0.904428	2018-08-01	2	3	2
328	Male	8.81	9.9	0.991375	2018-08-01	2	3	2
330	Male	7.21	9.2	1.01536	2018-08-01	2	3	2
331	Male	9.8	10	1.06939	2018-08-01	2	3	2
332	Male	8.24	9.7	0.986967	2018-08-01	2	3	2
333	Male	9.07	10.1	0.96006	2018-08-01	2	3	2
334	Male	4.99	8.2	0.999204	2018-08-01	2	3	2
335	Male	4	7.3	1.14305	2018-08-01	1	3	2
336	Male	5.22	8.2	1.04526	2018-08-01	2	3	2
337	Male	5.2	8.3	1.00335	2018-08-01	2	3	2
341	Male	11	10.7	0.975928	2018-09-01	2	3	2
342	Male	7.27	9.1	1.05861	2018-09-01	2	3	2
343	Male	11.28	10.4	1.09173	2018-09-01	2	3	2
344	Male	8.42	9.9	0.947489	2018-09-01	2	3	2
345	Male	13.66	11.4	0.998364	2018-09-01	2	3	2
346	Male	5.14	8.3	0.991775	2018-09-01	2	3	2
347	Male	8.43	9.4	1.11158	2018-09-01	2	3	2
348	Male	10.67	10.2	1.09589	2018-09-01	2	3	2
349	Male	7.06	8.7	1.17957	2018-09-01	2	3	2
350	Male	6.5	8.5	1.16609	2018-09-01	2	3	2
351	Male	4.74	7.7	1.15057	2018-09-01	2	3	2
352	Male	5.2	8	1.12295	2018-09-01	2	3	2
353	Male	8.62	9.2	1.21392	2018-09-01	2	3	2
354	Male	4.88	8	1.05385	2018-09-01	2	3	2
355	Male	8.28	9.4	1.0918	2018-09-01	2	3	2
356	Male	2.36	6.3	1.05837	2018-09-01	1	3	2
357	Male	7.12	8.9	1.1097	2018-09-01	2	3	2
358	Male	2.97	6.8	1.05444	2018-09-01	1	3	2
359	Male	9.57	9.8	1.11087	2018-09-01	2	3	2
360	Male	3.87	7.5	1.01814	2018-09-01	2	3	2
361	Male	3.73	7.4	1.02244	2018-09-01	1	3	2
362	Male	4.47	7.9	1.00317	2018-09-01	2	3	2
363	Male	5.25	8	1.13375	2018-09-01	2	3	2
364	Male	4.29	7.8	1.00104	2018-09-01	2	3	2
372	Male	7.72	10	0.842417	2018-10-01	2	3	2
373	Male	9.36	10.1	0.990756	2018-10-01	2	3	2
374	Male	6.77	9.3	0.922379	2018-10-01	2	3	2
376	Male	5.53	8.5	0.992071	2018-10-01	2	3	2
377	Male	9.54	10	1.04102	2018-10-01	2	3	2
378	Male	9.49	10.2	0.974694	2018-10-01	2	3	2
379	Male	8.42	10.1	0.891257	2018-10-01	2	3	2
380	Male	4.28	8	0.924276	2018-10-01	2	3	2
383	Male	6.25	8.9	0.974106	2018-10-01	2	3	2
384	Male	7.34	9.1	1.0688	2018-10-01	2	3	2
385	Male	8.45	9.9	0.950865	2018-10-01	2	3	2
386	Male	5.27	8.3	1.01686	2018-10-01	2	3	2
387	Male	3.73	7.7	0.905407	2018-10-01	2	3	2
388	Male	3.54	7.5	0.931324	2018-10-01	2	3	2
389	Male	2.47	6.7	0.91758	2018-10-01	1	3	2
390	Male	3.07	7	0.997455	2018-10-01	1	3	2
401	Male	10.49	10	1.14468	2018-11-01	2	3	2
402	Male	9.25	10.2	0.950044	2018-11-01	2	3	2
403	Male	5.63	8.8	0.908335	2018-11-01	2	3	2
404	Male	9.23	10.5	0.867548	2018-11-01	2	3	2
405	Male	9.63	10.7	0.85438	2018-11-01	2	3	2
406	Male	3.63	8	0.783907	2018-11-01	2	3	2
407	Male	2.42	6.9	0.821648	2018-11-01	1	3	2
408	Male	10.1	10.8	0.87094	2018-11-01	2	3	2
409	Male	11.09	10.8	0.956309	2018-11-01	2	3	2
410	Male	3.41	7.4	0.934727	2018-11-01	1	3	2
411	Male	4.35	8.2	0.871049	2018-11-01	2	3	2
412	Male	5.13	8.4	0.954239	2018-11-01	2	3	2
413	Male	5.61	9.1	0.816893	2018-11-01	2	3	2
414	Male	5.61	8.5	1.00642	2018-11-01	2	3	2
415	Male	3.87	8	0.835735	2018-11-01	2	3	2
416	Male	4.01	8	0.865969	2018-11-01	2	3	2
417	Male	3.33	7.5	0.876076	2018-11-01	2	3	2
419	Male	2.95	7.2	0.87933	2018-11-01	1	3	2
424	Male	3.73	7.5	0.98131	2018-11-01	2	3	2
429	Male	4.6	8.5	0.825231	2018-11-01	2	3	2
430	Male	5.4	9.1	0.786314	2018-12-01	2	3	2
431	Male	7.75	9.8	0.899604	2018-12-01	2	3	2
432	Male	8.89	10.5	0.835591	2018-12-01	2	3	2
434	Male	7.24	9.6	0.895119	2018-12-01	2	3	2
435	Male	8.13	10.2	0.835012	2018-12-01	2	3	2
437	Male	8.17	10.1	0.864795	2018-12-01	2	3	2
438	Male	5.97	9.2	0.840732	2018-12-01	2	3	2
439	Male	4.75	8.5	0.85214	2018-12-01	2	3	2
440	Male	5.56	9	0.837446	2018-12-01	2	3	2
441	Male	4.37	8.2	0.875054	2018-12-01	2	3	2
442	Male	6.56	9.3	0.893767	2018-12-01	2	3	2
443	Male	6.06	9.1	0.882419	2018-12-01	2	3	2
444	Male	4.83	8.7	0.806989	2018-12-01	2	3	2
445	Male	3.05	7.2	0.909138	2018-12-01	1	3	2
447	Male	3.98	8	0.85949	2018-12-01	2	3	2
460	Male	3.98	7.4	1.09097	2019-01-01	1	3	2
461	Male	2.9	6.8	1.02959	2019-01-01	1	3	2
462	Male	4.58	7.8	1.06871	2019-01-01	2	3	2
463	Male	3.79	7.3	1.08304	2019-01-01	1	3	2
464	Male	8.51	9.8	0.987823	2019-01-01	2	3	2
465	Male	11.68	10.1	1.23633	2019-01-01	2	3	2
466	Male	11.98	9.5	1.52936	2019-01-01	2	3	2
467	Male	10.51	10.2	1.07946	2019-01-01	2	3	2
468	Male	10.54	10.4	1.02011	2019-01-01	2	3	2
469	Male	3.21	7.3	0.917298	2019-01-01	1	3	2
483	Male	10.56	11.2	0.814734	2019-01-01	2	3	2
484	Male	10.02	10.7	0.888982	2019-01-01	2	3	2
485	Male	13.86	11.2	1.06934	2019-01-01	2	3	2
486	Male	10.85	10.4	1.05011	2019-01-01	2	3	2
487	Male	13.7	11.3	1.02864	2019-01-01	2	3	2
488	Male	11.52	10.7	1.02206	2019-01-01	2	3	2
489	Male	6.65	9.3	0.906029	2019-01-01	2	3	2
490	Male	13.37	11.3	1.00386	2019-01-01	2	3	2
514	Male	9.84	10.2	1.01064	2019-02-01	2	3	2
515	Male	11.11	10.2	1.14108	2019-02-01	2	3	2
516	Male	10.52	10.7	0.933342	2019-02-01	2	3	2
517	Male	11.05	10.4	1.06947	2019-02-01	2	3	2
518	Male	9.14	10.2	0.938746	2019-02-01	2	3	2
519	Male	8.48	10.2	0.870959	2019-02-01	2	3	2
520	Male	5.56	8.8	0.897041	2019-02-01	2	3	2
521	Male	3.71	7.8	0.865698	2019-02-01	2	3	2
522	Male	11.28	10.5	1.06023	2019-02-01	2	3	2
523	Male	13.72	10.9	1.15021	2019-02-01	2	3	2
524	Male	10.44	10.6	0.953235	2019-02-01	2	3	2
525	Male	7.18	9.5	0.916596	2019-02-01	2	3	2
526	Male	10.06	10.2	1.03324	2019-02-01	2	3	2
527	Male	11.98	10.7	1.06287	2019-02-01	2	3	2
528	Male	3.57	7.5	0.939217	2019-02-01	2	3	2
529	Male	11.87	10.6	1.0838	2019-02-01	2	3	2
530	Male	10.82	10.4	1.04721	2019-02-01	2	3	2
531	Male	12.2	10.5	1.14671	2019-02-01	2	3	2
532	Male	2.89	7.2	0.861445	2019-02-01	1	3	2
533	Male	5.43	8.6	0.939894	2019-02-01	2	3	2
552	Male	4.27	7.9	0.958289	2019-03-01	2	3	2
553	Male	3.26	7.3	0.931586	2019-03-01	1	3	2
554	Male	3.06	7.3	0.874434	2019-03-01	1	3	2
555	Male	2.94	7.3	0.840142	2019-03-01	1	3	2
556	Male	3.16	7.3	0.90301	2019-03-01	1	3	2
557	Male	6.92	8.6	1.1978	2019-03-01	2	3	2
558	Male	8.62	9.7	1.03248	2019-03-01	2	3	2
559	Male	4.38	8	0.945871	2019-03-01	2	3	2
560	Male	2.95	7.2	0.87933	2019-03-01	1	3	2
561	Male	7.17	9.2	1.00972	2019-03-01	2	3	2
562	Male	4.84	8	1.04521	2019-03-01	2	3	2
563	Male	2.8	7.3	0.800135	2019-03-01	1	3	2
564	Male	3.89	7.9	0.873008	2019-03-01	2	3	2
565	Male	5.17	8.4	0.961679	2019-03-01	2	3	2
566	Male	4.07	8	0.878926	2019-03-01	2	3	2
567	Male	4.13	7.9	0.92687	2019-03-01	2	3	2
568	Male	3.93	7.8	0.917033	2019-03-01	2	3	2
569	Male	2.21	6.5	0.900742	2019-03-01	1	3	2
570	Male	2.65	6.8	0.94083	2019-03-01	1	3	2
571	Male	4.4	8	0.95019	2019-03-01	2	3	2
592	Male	4.82	8.4	0.896575	2019-04-01	2	3	2
593	Male	4.05	7.8	0.945034	2019-04-01	2	3	2
594	Male	4.54	8.4	0.844492	2019-04-01	2	3	2
595	Male	4.81	8.4	0.894715	2019-04-01	2	3	2
596	Male	5.59	9	0.841965	2019-04-01	2	3	2
597	Male	11.14	10.8	0.960621	2019-04-01	2	3	2
598	Male	12.09	10.8	1.04254	2019-04-01	2	3	2
599	Male	10.94	10.4	1.05882	2019-04-01	2	3	2
600	Male	12.65	11.2	0.975984	2019-04-01	2	3	2
601	Male	8.47	9.8	0.98318	2019-04-01	2	3	2
602	Male	9.07	9.9	1.02063	2019-04-01	2	3	2
603	Male	10.31	10.7	0.914711	2019-04-01	2	3	2
604	Male	8.64	10	0.942809	2019-04-01	2	3	2
605	Male	1.79	5.9	0.98113	2019-04-01	1	3	2
606	Male	2.27	6.6	0.88298	2019-04-01	1	3	2
607	Male	2.24	6.3	1.00456	2019-04-01	1	3	2
608	Male	1.9	5.8	1.09733	2019-04-01	1	3	2
609	Male	2.67	6.9	0.906529	2019-04-01	1	3	2
610	Male	3.87	7.8	0.903033	2019-04-01	2	3	2
611	Male	10.75	10.7	0.953748	2019-04-01	2	3	2
612	Male	9.17	9.8	1.06443	2019-04-01	2	3	2
613	Male	5.51	8.7	0.920603	2019-04-01	2	3	2
632	Male	6.48	9.2	0.912553	2019-05-01	2	3	2
633	Male	5.54	8.7	0.925615	2019-05-01	2	3	2
634	Male	4.99	8.4	0.928197	2019-05-01	2	3	2
635	Male	5.87	8.8	0.947056	2019-05-01	2	3	2
636	Male	4.89	8.4	0.909596	2019-05-01	2	3	2
637	Male	5.02	8.5	0.900578	2019-05-01	2	3	2
638	Male	3.11	7.2	0.927023	2019-05-01	1	3	2
639	Male	5.24	8.5	0.940045	2019-05-01	2	3	2
640	Male	4.87	8.4	0.905876	2019-05-01	2	3	2
641	Male	10.77	10.7	0.955522	2019-05-01	2	3	2
642	Male	10.8	10.9	0.905412	2019-05-01	2	3	2
643	Male	5.12	8.7	0.855442	2019-05-01	2	3	2
644	Male	10.28	10.6	0.938626	2019-05-01	2	3	2
645	Male	9.38	10.5	0.881647	2019-05-01	2	3	2
646	Male	10.33	10.6	0.943191	2019-05-01	2	3	2
647	Male	10.4	10.7	0.922695	2019-05-01	2	3	2
648	Male	5.34	9.2	0.752011	2019-05-01	2	3	2
649	Male	10.08	10.4	0.975586	2019-05-01	2	3	2
650	Male	8.41	10.4	0.813956	2019-05-01	2	3	2
651	Male	7.95	9.6	0.9829	2019-05-01	2	3	2
671	Male	4.43	8.2	0.887069	2019-06-01	2	3	2
672	Male	9.16	10	0.999552	2019-06-01	2	3	2
673	Male	10.19	10.2	1.04659	2019-06-01	2	3	2
674	Male	8.56	9.8	0.993627	2019-06-01	2	3	2
675	Male	9.43	10.3	0.940054	2019-06-01	2	3	2
676	Male	5.48	8.6	0.948549	2019-06-01	2	3	2
677	Male	5.74	8.6	0.993553	2019-06-01	2	3	2
678	Male	5.72	8.7	0.955689	2019-06-01	2	3	2
679	Male	11.11	10.7	0.985687	2019-06-01	2	3	2
680	Male	7.85	9.4	1.0351	2019-06-01	2	3	2
681	Male	11.39	10.4	1.10237	2019-06-01	2	3	2
682	Male	13.79	11.4	1.00786	2019-06-01	2	3	2
683	Male	5.65	8.7	0.943994	2019-06-01	2	3	2
684	Male	8.76	9.5	1.1183	2019-06-01	2	3	2
685	Male	11.09	10.4	1.07334	2019-06-01	2	3	2
686	Male	7.62	9	1.14772	2019-06-01	2	3	2
687	Male	7.02	8.8	1.13259	2019-06-01	2	3	2
688	Male	8.96	9.3	1.22076	2019-06-01	2	3	2
689	Male	5.36	8.4	0.997021	2019-06-01	2	3	2
690	Male	2.59	6.6	1.00745	2019-06-01	1	3	2
691	Male	7.68	9.2	1.08154	2019-06-01	2	3	2
14	Female	2.87	7.55	0.739864	2017-07-01	2	3	1
15	Female	2.24	7	0.727785	2017-07-01	2	3	1
16	Female	1.74	6.2	0.81947	2017-07-01	2	3	1
17	Female	2.68	7.3	0.765844	2017-07-01	2	3	1
18	Female	1.4	5.95	0.747809	2017-07-01	1	3	1
19	Female	6.06	9.2	0.853406	2017-07-01	2	3	1
22	Female	5.7	9.3	0.776597	2017-07-01	2	3	1
36	Female	3.14	7.8	0.732693	2017-08-01	2	3	1
37	Female	2.38	7	0.773272	2017-08-01	2	3	1
38	Female	1.91	6.4	0.816279	2017-08-01	2	3	1
39	Female	3.54	7.8	0.82603	2017-08-01	2	3	1
50	Female	3.54	7.6	0.894344	2017-09-01	2	3	1
51	Female	7.05	9.9	0.793325	2017-09-01	2	3	1
52	Female	2.55	7	0.828505	2017-09-01	2	3	1
53	Female	1.33	5.3	1.01205	2017-09-01	1	3	1
68	Female	5.62	8.5	1.00822	2017-10-01	2	3	1
69	Female	5.5	8.5	0.986689	2017-10-01	2	3	1
70	Female	5.46	8.1	1.13513	2017-10-01	2	3	1
71	Female	4.27	8	0.922116	2017-10-01	2	3	1
72	Female	4.24	7.7	1.0292	2017-10-01	2	3	1
73	Female	2.53	6.6	0.984115	2017-10-01	2	3	1
78	Female	4.47	8.8	0.721182	2017-11-01	2	3	1
79	Female	1.8	6.7	0.668682	2017-11-01	2	3	1
80	Female	2.16	6.7	0.802419	2017-11-01	2	3	1
81	Female	8.17	10.2	0.83912	2017-11-01	2	3	1
82	Female	3.12	7.2	0.930003	2017-11-01	2	3	1
83	Female	4.3	8.2	0.861037	2017-11-01	2	3	1
84	Female	3.99	7.5	1.04971	2017-11-01	2	3	1
85	Female	3.46	7.2	1.03135	2017-11-01	2	3	1
88	Female	4.7	7.9	1.05479	2017-11-01	2	3	1
89	Female	5.8	8.6	1.00394	2017-11-01	2	3	1
109	Female	6.12	8.7	1.02252	2017-12-01	2	3	1
110	Female	4.2	7.7	1.01949	2017-12-01	2	3	1
111	Female	5.67	8.7	0.947335	2017-12-01	2	3	1
112	Female	4.91	8.3	0.947396	2017-12-01	2	3	1
113	Female	4.14	7.6	1.04593	2017-12-01	2	3	1
114	Female	4.75	8	1.02577	2017-12-01	2	3	1
115	Female	6.31	8.5	1.132	2017-12-01	2	3	1
116	Female	5.97	8.5	1.07101	2017-12-01	2	3	1
117	Female	3.18	7.4	0.87168	2017-12-01	2	3	1
118	Female	3.22	7.2	0.959811	2017-12-01	2	3	1
133	Female	8.6	9.5	1.09787	2018-01-01	2	3	2
134	Female	8.71	10	0.950448	2018-01-01	2	3	2
135	Female	3.57	7	1.15991	2018-01-01	2	3	2
136	Female	6.98	9	1.05133	2018-01-01	2	3	2
137	Female	7.5	9	1.12965	2018-01-01	2	3	2
139	Female	6.16	8.5	1.10509	2018-01-01	2	3	2
140	Female	2.78	6	1.44741	2018-01-01	1	3	2
141	Female	4.84	7.7	1.17484	2018-01-01	2	3	2
142	Female	7.42	9	1.1176	2018-01-01	2	3	2
143	Female	2.85	6.5	1.16159	2018-01-01	2	3	2
144	Female	10.34	10	1.12832	2018-01-01	2	3	2
145	Female	9.48	10.9	0.79475	2018-01-01	2	3	2
165	Female	6.12	8.7	1.02252	2018-02-01	2	3	2
166	Female	4.2	7.7	1.01949	2018-02-01	2	3	2
167	Female	5.67	8.7	0.947335	2018-02-01	2	3	2
168	Female	4.91	8.3	0.947396	2018-02-01	2	3	2
169	Female	4.14	7.6	1.04593	2018-02-01	2	3	2
170	Female	4.75	8	1.02577	2018-02-01	2	3	2
171	Female	6.31	8.5	1.132	2018-02-01	2	3	2
172	Female	5.97	8.5	1.07101	2018-02-01	2	3	2
173	Female	3.18	7.4	0.87168	2018-02-01	2	3	2
174	Female	3.22	7.2	0.959811	2018-02-01	2	3	2
186	Female	6.79	8.9	1.05827	2018-03-01	2	3	2
187	Female	12.1	10.8	1.0434	2018-03-01	2	3	2
188	Female	7.93	9.4	1.04565	2018-03-01	2	3	2
201	Female	3.45	7.5	0.907646	2018-04-01	2	3	2
202	Female	6.65	9	1.00162	2018-04-01	2	3	2
203	Female	8.43	9.2	1.18716	2018-04-01	2	3	2
204	Female	4.66	8	1.00634	2018-04-01	2	3	2
205	Female	2.57	6.8	0.912428	2018-04-01	2	3	2
206	Female	2.24	6.2	1.05495	2018-04-01	2	3	2
207	Female	3.74	7.4	1.02518	2018-04-01	2	3	2
208	Female	1.88	6	0.978821	2018-04-01	1	3	2
209	Female	1.78	5.9	0.975649	2018-04-01	1	3	2
210	Female	1.69	6	0.879897	2018-04-01	1	3	2
211	Female	2.9	6.5	1.18197	2018-04-01	2	3	2
212	Female	2.38	6.2	1.12088	2018-04-01	2	3	2
213	Female	2.16	6.4	0.923122	2018-04-01	2	3	2
214	Female	3.71	7.2	1.10587	2018-04-01	2	3	2
215	Female	1.13	5	1.02764	2018-04-01	1	3	2
216	Female	2.32	6.4	0.991502	2018-04-01	2	3	2
217	Female	3.45	7.4	0.945691	2018-04-01	2	3	2
218	Female	3.08	7	1.0007	2018-04-01	2	3	2
219	Female	2.24	6.7	0.832138	2018-04-01	2	3	2
220	Female	2.1	6	1.09336	2018-04-01	1	3	2
234	Female	2.79	6.9	0.947272	2018-05-01	2	3	2
241	Female	4.39	7.9	0.98522	2018-05-01	2	3	2
245	Female	3.33	7.5	0.876076	2018-05-01	2	3	2
271	Female	2.02	6.1	0.999856	2018-06-01	2	3	2
272	Female	1.87	5.8	1.08	2018-06-01	1	3	2
273	Female	3.72	7.5	0.97868	2018-06-01	2	3	2
274	Female	1.6	5.5	1.08708	2018-06-01	1	3	2
275	Female	2.39	6.4	1.02142	2018-06-01	2	3	2
276	Female	1.58	5.8	0.912517	2018-06-01	1	3	2
277	Female	2.88	6.8	1.02249	2018-06-01	2	3	2
278	Female	1.63	5.6	1.04807	2018-06-01	1	3	2
279	Female	1.97	6.1	0.975107	2018-06-01	2	3	2
280	Female	2.1	6.3	0.941774	2018-06-01	2	3	2
284	Female	7.47	9.7	0.894738	2018-07-01	2	3	2
300	Female	6.4	8.8	1.03257	2018-07-01	2	3	2
301	Female	8.3	9.5	1.05957	2018-07-01	2	3	2
302	Female	4.39	7.3	1.2545	2018-07-01	2	3	2
303	Female	3.95	7.6	0.997926	2018-07-01	2	3	2
304	Female	8.81	10	0.96136	2018-07-01	2	3	2
305	Female	4.38	8.1	0.910602	2018-07-01	2	3	2
306	Female	6.04	8.8	0.974483	2018-07-01	2	3	2
307	Female	3.45	7.4	0.945691	2018-07-01	2	3	2
308	Female	4.65	8.1	0.966735	2018-07-01	2	3	2
309	Female	4.28	7.9	0.960533	2018-07-01	2	3	2
310	Female	3.2	7.1	0.995545	2018-07-01	2	3	2
324	Female	8.24	9.6	1.01875	2018-08-01	2	3	2
325	Female	9.43	10.3	0.940054	2018-08-01	2	3	2
329	Female	7.86	9.6	0.971773	2018-08-01	2	3	2
338	Female	3	7	0.974712	2018-08-01	2	3	2
339	Female	9.2	10	1.00392	2018-08-01	2	3	2
340	Female	2.42	6.7	0.899006	2018-08-01	2	3	2
365	Female	3.87	7.2	1.15356	2018-09-01	2	3	2
366	Female	8.32	10	0.90789	2018-09-01	2	3	2
367	Female	4.04	7.5	1.06287	2018-09-01	2	3	2
368	Female	3.56	7.1	1.10754	2018-09-01	2	3	2
369	Female	3.97	7.2	1.18337	2018-09-01	2	3	2
370	Female	3.12	7.2	0.930003	2018-09-01	2	3	2
371	Female	10.55	10.9	0.884453	2018-10-01	2	3	2
375	Female	9.18	10.7	0.814456	2018-10-01	2	3	2
381	Female	6.59	9	0.992585	2018-10-01	2	3	2
382	Female	5.72	8.5	1.02616	2018-10-01	2	3	2
391	Female	5.2	8.4	0.96726	2018-10-01	2	3	2
392	Female	6.71	9.3	0.914204	2018-10-01	2	3	2
393	Female	3.95	7.7	0.958809	2018-10-01	2	3	2
394	Female	6.51	9	0.980535	2018-10-01	2	3	2
395	Female	5.59	8.3	1.0786	2018-10-01	2	3	2
396	Female	4.55	7.5	1.19704	2018-10-01	2	3	2
397	Female	3.99	7.6	1.00803	2018-10-01	2	3	2
398	Female	5.16	8.1	1.07276	2018-10-01	2	3	2
399	Female	3.51	7.4	0.962138	2018-10-01	2	3	2
400	Female	4.66	7.8	1.08737	2018-10-01	2	3	2
418	Female	4.92	8.5	0.882638	2018-11-01	2	3	2
420	Female	4.56	8	0.984742	2018-11-01	2	3	2
421	Female	3.41	7.5	0.897123	2018-11-01	2	3	2
422	Female	5.05	9	0.76063	2018-11-01	2	3	2
423	Female	5.62	8.7	0.938981	2018-11-01	2	3	2
425	Female	4	8.1	0.8316	2018-11-01	2	3	2
426	Female	4.74	8.6	0.82046	2018-11-01	2	3	2
427	Female	3.62	7.8	0.844697	2018-11-01	2	3	2
428	Female	3.67	7.8	0.856365	2018-11-01	2	3	2
433	Female	7.39	9.9	0.831585	2018-12-01	2	3	2
436	Female	5.51	9	0.829915	2018-12-01	2	3	2
446	Female	4.57	8.8	0.737316	2018-12-01	2	3	2
[truncated: 1,418 more rows]
